# Supplementary material for: Hepatic neddylation deficiency triggers fatal liver injury via inducing NF-κB-inducing kinase in mice
Source: Springer Nature journal article supplement (doi:10.1038/s41467-022-35525-6), 2022-12-16
Supplement: MOESM1 [file 41467_2022_35525_MOESM1_ESM.pdf]

## **SUPPLEMENTARY INFORMATION**

### **Hepatic neddylation deficiency triggers fatal liver injury via inducing NF- $\kappa$ B-inducing kinase in mice**

#### **SUPPLEMENTARY METHODS**

##### **Transmission electron microscopy**

For electron microscopy, freshly harvested livers were fixed overnight at 4°C in 4% PFA, 2% glutaraldehyde in 0.1 M sodium cacodylate buffer, followed by 1 h post-fixation with 2% osmium tetroxide. Upon 2% uranyl acetate treatment, samples were dehydrated with a graded series of ethanol and embedded in Epon-Araldite resin (Electron Microscopy Sciences). Sections (100 nm thickness) were cut, doubly contrasted with uranyl acetate and lead citrate, and finally imaged under a JEM 1230 transmission electron microscope (JEOL, Tokyo, Japan).

##### **Measurement of liver triglyceride content and Oil Red O staining**

Liver lipids were extracted from tissues (20-25 mg) according to a modified protocol as previously described<sup>1</sup>. In brief, tissues were homogenized in a solvent system consisting of chloroform/methanol/water 2:2:1.8 (v/v/v), following centrifugation at 3,500 X g for 5 min. The lower phase was transferred and evaporated by nitrogen flow. The dry extracts were dissolved in appropriate amounts of chloroform, and TG content was measured colorimetrically using the Infinity Triglycerides kit (Thermo Fisher Scientific). Data were normalized to tissue weights. To assess the hepatic steatosis, liver frozen sections (10  $\mu$ m thickness) were fixed with 4% PFA and subjected to Oil red O staining using Oil Red O solution (Electron Microscopy Sciences) using standard methods<sup>2</sup>.

##### **Immunohistochemistry**

Liver sections were deparaffinized, hydrated, and treated with 3% hydrogen peroxide to quench background peroxidase. Antigen retrieval was carried out by boiling in 10 mM citrate buffer (pH 6.0) for 10 min using a microwave. The specimens were blocked in 5% normal horse serum for

1 h at room temperature followed by overnight incubation at 4°C with primary antibodies. After washing with PBS, a biotinylated universal pan-specific antibody provided in a VECTASTAIN Elite ABC HRP kit (Vector Laboratories, Burlingame, CA) was applied for 30 min at room temperature. The specimens were subsequently exposed to avidin-biotin-peroxidase complexes for 30 min, developed using DAB Substrate Kit (Vector Laboratories), and then counterstained with hematoxylin.

### **Reactive oxygen species (ROS) measurement and analysis of Glutathione (GSH) and GSSG levels.**

Total ROS production was measured using a method previously described with minor modifications<sup>3</sup>. Liver tissues were homogenized in a lysis buffer and centrifuged, then the supernatant was mixed with a dichlorofluorescein diacetate probe (DCFH-DA, Sigma-Aldrich) to a final probe concentration of 5 µM. The reaction mixture was incubated in the dark for 1 h at 37°C. Finally, the DCF fluorescence intensity was measured using a GloMax Discover microplate reader (Promega) with an excitation and emission wavelength of 485 and 530 nm respectively. Data were normalized to protein concentration as determined by the Bradford protein assay. ROS generation by mitochondria in cells was analyzed using the MitoSOX Red superoxide indicator (Invitrogen) according to the manufacturer's instructions. MitoSOX reagent was applied at a working concentration of 5 µM to incubate cells for 15 min at 37°C protected from light. Cells were counterstained with Hoechst33342 (Thermo Fisher Scientific) and imaged using a fluorescence microscope. The positive cells were counted and normalized to the total cell number. The GSH levels in hepatocytes and liver tissues were determined using a GSH/GSSG Ratio Detection Assay Kit (Fluorometric - Green) (ab138881, Abcam) or GLUTATHIONE GSH/GSSG ASSAY KIT (MAK440, Sigma-Aldrich) according to the manufacturer's instructions. Data were normalized to protein concentration or liver weights.

### **ATP content and cell viability assays**

The intracellular ATP contents in hepatocytes were determined using an ATP Bioluminescent Assay Kit (Sigma-Aldrich) according to the manufacturer's instructions. Briefly, cells were lysed in 0.1% Triton-X100 supplemented with protease inhibitor and centrifuged. The supernatant was collected and diluted in distilled H<sub>2</sub>O. Luminescence signals were measured using a Centro XS<sup>3</sup> LB 960 microplate luminometer (Berthold Technologies). ATP contents were normalized to protein concentration in each sample as performed by Bradford protein assay. Hepatocyte viability was determined using a Vybrant MTT cell proliferation assay kit (Thermo Fisher Scientific) assay according to the manufacturer's instructions.

### **Mass spectrometry to identify neddylation sites on NIK**

NIK-HA was transfected into HEK293T cells together with FLAG-NEDD8. Forty-eight hours later, denaturing cell lysates were prepared and immunoprecipitated with anti-HA magnetic beads. The beads were washed three times with cell lysis buffer and eluted with 1× loading buffer. The eluate was collected and resolved using 4-20% SDS-PAGE. Gels were coomassie blue stained using SimplyBlue Safestain (Thermo Fisher Scientific) according to Creative Proteomics (Shirley, NY). The band at or above NIK-HA was excised and subject to in-gel trypsin digestion. Peptides were extracted and subject to Nano LC-MS/MS analysis using Ultimate 3000 nano UHPLC system (Thermo Fisher Scientific, USA) coupled with mass spectrometry analysis. Raw MS files were analyzed and searched against MAP3K14 (NP\_003945.2) reference sequence using Maxquant (1.6.2.6.).

### **Preparation of nuclear extracts from mouse liver**

Nuclear extracts were prepared from freshly collected liver according to a previously published protocol with modifications<sup>4</sup>. Briefly, about 200 mg of liver were cut into pieces in 1xSSC buffer (150 mM NaCl, 15 mM Sodium Citrate pH 7.0) followed by vigorous shaking and centrifugation at 4,400 rpm for 2 min to remove supernatant. Pellets were resuspended in 5 ml of hypotonic buffer (10 mM HEPES pH 7.9, 1.5 mM MgCl<sub>2</sub>, 10 mM KCl, 0.2% NP40, 1 mM EDTA and 5%

sucrose) and dounced 4-5 times with 7 ml homogenizer and pestle. Liver homogenate solution was then laid on top of the 5 ml of cushion buffer (10 mM Tris pH 7.5, 15 mM NaCl, 60 mM KCl, 1 mM EDTA, and 10% sucrose) in a 15 ml tube followed by centrifugation at 5,000 rpm for 1 min, and an additional 5 min to completely remove supernatant. The nuclei pellets were then resuspended with 1 ml of TEG buffer (50 mM Tris pH 8.0, 1 mM EDTA, 15% glycerol, 500 mM NaCl), sonicated for 5 sec on ice slurry, and incubated on ice for 30 min. Nuclear extracts were then collected after ultracentrifugation at 46,000 rpm for 30 min. All procedures were performed at 4 °C with protease and phosphatase inhibitors freshly added to the buffers.

## SUPPLEMENTARY TABLES

**Supplementary Table 1. Primary and secondary antibodies used for immunoblotting, immunoprecipitation, and immunostaining**

| Antibody                               | Supplier (Catalog No.)                | Dilution |
|----------------------------------------|---------------------------------------|----------|
| ACTB (clone C4)                        | Sigma-Millipore (MAB1501)             | 1:5000   |
| Albumin                                | Novus Biologicals (NB600-41532) (IF)  | 1:100    |
| Catalase                               | Genetex (GTX110704)                   | 1:1000   |
| C/EBP $\alpha$                         | Santa Cruz (sc-61)                    | 1:500    |
| CK19                                   | Abdomax (602-670) (IF)                | 1:500    |
| Pan-Cytokeratin (clone K4.62)          | Sigma Aldrich (C7159) (IF)            | 1:20     |
| Cleaved caspase-3                      | Cell Signaling Technology (9661)      | 1:1000   |
| Cleaved caspase-8                      | Cell Signaling Technology (9429)      | 1:1000   |
| CTNB1 (clone D10A8)                    | Cell Signaling Technology (8480)      | 1:1000   |
| CUL1                                   | Santa Cruz (sc-1384)                  | 1:1000   |
| CUL2 (clone EPR3104(2))                | Abcam (ab166917)                      | 1:1000   |
| CUL3                                   | Cell Signaling Technology (2759)      | 1:1000   |
| CUL4a                                  | Novus Biologicals (NB100-2267)        | 1:1000   |
| Desmin (clone DE-U-10)                 | Sigma Aldrich (D1033) (IF)            | 1:40     |
| FLAG (clone M2)                        | Sigma Aldrich (SLBD6976)              | 1:1000   |
| F4/80 (clone Cl:A3-1)                  | Bio-Rad (MCA497GA) (IF)               | 1:50     |
| GAPDH (clone 1E6D9)                    | Proteintech (60004-1-IG)              | 1:20000  |
| GFP                                    | Abcam (ab290)                         | 1:1000   |
| HA (clone C29F4)                       | Cell Signaling Technology (3724)      | 1:1000   |
| Anti-HA magnetic beads                 | ThermoFisher Scientific (PI88836)     |          |
| HNF4 $\alpha$ (clone F.674.9)          | ThermoFisher Scientific (MA5-14891)   | 1:500    |
| HNF4 $\alpha$ (clone K9218)            | ThermoFisher Scientific (MA1-199)     | 1:1000   |
| I $\kappa$ B $\alpha$ (clone L35A5)    | Cell Signaling Technology (4814)      | 1:1000   |
| p-I $\kappa$ B $\alpha$ (clone 14D4)   | Cell Signaling Technology (2859)      | 1:1000   |
| Ki-67 (clone D3B5)                     | Cell Signaling Technology (9129) (IF) | 1:400    |
| LMNB2                                  | Proteintech (10895-1-AP)              | 1:2000   |
| MLKL                                   | Abcam (ab172868)                      | 1:1000   |
| MYC (clone 9B11)                       | Cell signaling technology (2276)      | 1:1000   |
| Anti-MYC magnetic beads                | ThermoFisher Scientific (PI) (IP)     |          |
| NAE1 (clone D9I4Z)                     | Cell Signaling Technology (14321)     | 1:1000   |
| NEDD8 (clone 19E3)                     | Cell Signaling Technology (2754)      | 1:1000   |
| NEDD8 (clone 19E3)                     | Cell Signaling Technology (2754) (IF) | 1:300    |
| p-NF- $\kappa$ B2 p100(Ser866/870)     | Cell Signaling Technology (4810)      | 1:1000   |
| NF- $\kappa$ B2 p100/p52               | Cell Signaling Technology (4882)      | 1:1000   |
| NIK                                    | Cell Signaling Technology (4994)      | 1:1000   |
| NIK (clone A-12)                       | Santa Cruz Biotechnology (sc-8417)    |          |
| NOX2 (clone 53)                        | BD Biosciences (611414)               | 1:1000   |
| NRF2 (clone D1Z9C)                     | Cell Signaling Technology (4994)      | 1:1000   |
| P53 (clone D2H9O)                      | Cell Signaling Technology (32532)     | 1:500    |
| P65 (clone D14E12)                     | Cell Signaling Technology (8242)      | 1:1000   |
| RBX2                                   | Proteintech (11905-1-AP)              | 1:1000   |
| p-RIPK3(T231+S232) (clone EPR19403-52) | Abcam (ab201912)                      | 1:5000   |
| RIPK3                                  | Novus Biologicals (NBP1-77299)        | 1:2000   |

|                                                                            |                                       |        |
|----------------------------------------------------------------------------|---------------------------------------|--------|
| RIPK3                                                                      | Novus Biologicals (NBP1-77299)        | 1:200  |
| SOD1                                                                       | Proteintech (10269-1-AP)              | 1:1000 |
| SOD2                                                                       | Proteintech (24127-1-AP)              | 1:5000 |
| UBC12 (clone D13D7)                                                        | Cell Signaling Technology (5641) (IB) | 1:1000 |
| UBC12 (clone D-4)                                                          | Santa Cruz (sc-390064) (IP)           |        |
| Ubiquitin (clone P4D1)                                                     | Cell Signaling Technology (3936)      | 1:1000 |
| Xanthine oxidase (clone A-3)                                               | Santa Cruz (sc-398548)                | 1:500  |
| YAP (clone D8H1X)                                                          | Cell Signaling Technology (14074)     | 1:1000 |
| Alexa Fluor 488-conjugated goat anti-Rabbit IgG (H+L)                      | ThermoFisher (A11034)                 | 1:500  |
| Alexa Fluor 594-conjugated F(ab') <sub>2</sub> -goat anti-Rabbit IgG (H+L) | ThermoFisher (A11072)                 | 1:500  |
| Alexa Fluor 594-conjugated goat anti-mouse IgG (H+L)                       | ThermoFisher (A11032)                 | 1:500  |
| Goat anti-Rat IgG (H+L) Cross Adsorbed Secondary Antibody, Alexa Fluor 647 | ThermoFisher (A21247)                 | 1:500  |
| Alexa Fluor Plus 594-conjugated donkey anti-Goat IgG (H+L)                 | ThermoFisher (A32758)                 | 1:500  |
| Alexa Fluor 488-conjugated donkey anti-rabbit IgG (H+L)                    | ThermoFisher (A21206)                 | 1:500  |
| HRP-conjugated goat anti-rabbit IgG (H+L)                                  | Bio-rad, 1706515                      | 1:300  |
| HRP-conjugated goat anti-mouse IgG (H+L)                                   | Bio-rad, 1706516                      | 1:300  |

**Supplementary Table 2. Primer sequences used for qRT-PCR**

| <b>Gene</b>    | <b>Species</b> | <b>Forward Primer Sequence</b> | <b>Reverse Primer Sequence</b> |
|----------------|----------------|--------------------------------|--------------------------------|
| <i>Alb</i>     | mouse          | GCAGATGACAGGGCGGAACTTG         | CAGCAGCAATGGCAGGCAGAT          |
| <i>Acta2</i>   | mouse          | CACTGAACCCTAAGGCCAAC           | CATCTCCAGAGTCCAGCACA           |
| <i>Adgre1</i>  | mouse          | CTTTGGCTATGGGCTTCCAGTC         | GCAAGGAGGACAGAGTTTATCGTG       |
| <i>AMOTL2</i>  | human          | GCTTCAATGAGGGTCTGCTC           | GATCACTGCATCCTTCTCCA           |
| <i>Cebpa</i>   | mouse          | GAACAGCAACGAGTACCGGGTA         | GCCATGGCCTTGACCAAGGAG          |
| <i>CEBPa</i>   | human          | GTGGACAAGAACAGCAACGA           | GGTCAGCTCCAGCACCTT             |
| <i>Ccl2</i>    | mouse          | CAGCAAGATGATCCCAATGA           | TGTCTGGACCCATTCTTCT            |
| <i>Cd68</i>    | mouse          | CCAATTCAGGGTGGAAAGAAA          | GACTGTACTCGGGCTCTGATG          |
| <i>Cd34</i>    | mouse          | GGGTAGCTCTCTGCCTGATG           | TGGCTGGTGTGGTCTTACTG           |
| <i>Col1a1</i>  | mouse          | AAGACGGACTCAACGGTCTC           | CTGAGGCAGGAAGCTGAAGT           |
| <i>Col1a2</i>  | mouse          | GTCCTAGTCGATGGCTGCTC           | GTCAGCACCACCAATGTCC            |
| <i>Col3a1</i>  | mouse          | ACGTGGTAGTCCTGGTGGTC           | GTCCAGCTATTCCAGGGTTG           |
| <i>Col4a1</i>  | mouse          | TTTGACATGCGACTCAAAGG           | CGATGTCTCCACGACTACCA           |
| <i>Col6a1</i>  | mouse          | TCTGACACTCAACGGGACAC           | TGGCAGGAAATGACATTGAG           |
| <i>Ccn2</i>    | mouse          | CTTCCCGAGAAGGGTCAAG            | GGCCAAATGTGTCTTCCAGT           |
| <i>Cyp1a2</i>  | mouse          | CTCACTGAATGGCTTCCACA           | CCGAAGAGCATCACCTTCTC           |
| <i>Cyp2a4</i>  | mouse          | GGTCACCAAGGACACCAAGT           | GGAAGTGCTTTGGGTTGAAG           |
| <i>Cxcl14</i>  | mouse          | AAGCTGGAAATGAAGCCAAA           | CCAGGCATTGTACCACTTGA           |
| <i>Esrp2</i>   | mouse          | ACAGAGGAGATGAGCCGTGT           | CTGGAAGGTGGCGTAGGTAG           |
| <i>Fbp1</i>    | mouse          | TCAACTGCTTCATGCTGGAC           | AGTCCTTGGCATAACCCTCA           |
| <i>Gclc</i>    | mouse          | GGATTCACACTGCCAGAACA           | TGGCACATTGATGACAACCT           |
| <i>Gclm</i>    | mouse          | CAAGTTAACCTGGCCTCCTG           | TCAATGTCAGGGATGCTTTCT          |
| <i>Gss</i>     | mouse          | CTTGCTGCTCCTAGCCACTT           | AGGCTCTCTCCTCACTGTCTT          |
| <i>Gsr</i>     | mouse          | CAGATGTTGACTGCCTGCTC           | GACGTCTCCCACAGCATAGAC          |
| <i>Gls2</i>    | mouse          | CCGTGGTGAACCTGCTATTT           | GTGCGGGAATCATAGTCCTT           |
| <i>Hnf4a</i>   | mouse          | GCATGGATATGGCCGACTACA          | ACCTTCAGATGGGGACGTGT           |
| <i>HNF4a</i>   | human          | CGTGGTGGACAAAGACAAGA           | GCTTGACCTTCGAGTGCTG            |
| <i>Hmgcs2</i>  | mouse          | CCTACCGCAAGAAGATCCAG           | CACTGCTGGATGACAGGAAG           |
| <i>Itgax</i>   | mouse          | TGATGAGCCAGCTTCAGAGA           | GCTGCCTTACAGAACCCAAC           |
| <i>Krt19</i>   | mouse          | CGGACCTCCCGAGATTACA            | TGGAGTTGTCAATGGTGGCA           |
| <i>KRT19</i>   | human          | GACATGCGAAGCCAATATGA           | TCAGTAACCTCGGACCTGCT           |
| <i>Krt18</i>   | mouse          | CGAGGCACTCAAGGAAGAAC           | GCATCCACTTCCACAGTCAA           |
| <i>Lgals3</i>  | mouse          | CCTATGACCTGCCCTTGC             | CCCAGTTGGCTGATTTCC             |
| <i>Mgst3</i>   | mouse          | TTGTGCTTCTCACTGGTGCT           | AACATATGCCCGTTCTCAGG           |
| <i>Map3k14</i> | mouse          | TGACATCCCGAGCTACTTCA           | AGCAAACAGGCTGTCCATCT           |
| <i>MAP3K14</i> | human          | TGTGGGAACCCTTACCTCTG           | CGAGAGAATTTGCTCCTGCT           |
| <i>Opn</i>     | mouse          | CTGACCCATCTCAGAAGCAGAATCT      | TCCATGTGGTCATGGCTTTCATTGG      |
| <i>OPN</i>     | human          | GCCGAGGTGATAGTGTGGTT           | TGAGGTGATGTCTCTCGTCTG          |
| <i>Pkm</i>     | mouse          | CGATCTGTGGAGATGCTGAA           | TTCACGGACATTCTTGATGG           |
| <i>PKM</i>     | human          | TGCTGGAGAAACAGCCAAA            | CCATGAGGTCTGTGGAGTGA           |
| <i>Pck1</i>    | mouse          | CCATCACCTCCTGGAAGAAC           | ACGGCCACCAAAGATGATAC           |
| <i>PCK1</i>    | human          | ACATCTGTGACGGCTCTGAG           | GGATGGGCACTGTGTCTCTT           |
| <i>Ppara</i>   | mouse          | CCACGAAGCCTACCTGAAGA           | ACTGGCAGCAGTGAAGAAT            |
| <i>Pgc1a</i>   | mouse          | CCCTGCCATTGTTAAGACC            | TGCTGCTGTTCTGTTTTTC            |
| <i>Srebf1</i>  | mouse          | AGGCCCGGGAAGTCACTGT            | GGAGCCATGGATTGCACATT           |
| <i>Sox9</i>    | mouse          | CAGACCAGTACCCGCATCT            | CTCCTCCACGAAGGGTCTC            |
| <i>Tnf</i>     | mouse          | TGCCTATGTCTCAGCCTCTTC          | GGAGGCCATTTGGGAACT             |

**Supplementary Table 3. Summary of plasmids including names, features, and sources.**

| <b>Plasmids name</b>                          | <b>Features</b>                                                        | <b>Sources</b>              |
|-----------------------------------------------|------------------------------------------------------------------------|-----------------------------|
| pCMV4-HA                                      | pCMV4 empty vector with CMV promoter                                   | Addgene#27553 <sup>5</sup>  |
| pCMV4-NIK-HA                                  | Human NIK with C-terminal 1x HA tag                                    | Addgene#27554 <sup>5</sup>  |
| pcDNA3.1 (+)-NIK-HA                           | Human NIK with C-terminal 1x HA tag (MAP3K14_OHu27997C)                | GenScript#SC1200            |
| pcDNA3.1 (+)- NIK-K385R-HA                    | Human NIK K385R with C-terminal 1xHA tag                               | GenScript#SC1200M           |
| pcDNA3.1 (+)-NIK-K387R-HA                     | Human NIK K387R with C-terminal 1xHA tag                               | GenScript#SC1200M           |
| pcDNA3.1 (+)- NIK-K607R-HA                    | Human NIK K607R with C-terminal 1xHA tag                               | GenScript#SC1200M           |
| pcDNA3.1 (+)- NIK-K650R-HA                    | Human NIK K650R with C-terminal 1xHA tag                               | GenScript#SC1200M           |
| pcDNA3.1 (+)- NIK-K4R-HA                      | Human NIK K385R, K387R, K607R, K650R with C-terminal 1xHA tag          | GenScript#SC1200M           |
| pcDNA3.1 (+)- NIK-K49R-HA                     | Human NIK K49R, with C-terminal 1xHA tag                               | GenScript#SC1626            |
| pcDNA3.1 (+)- NIK-K29R-HA                     | Human NIK K29R with C-terminal 1xHA tag                                | GenScript#SC1625            |
| pcDNA3.1 (+)- NIK-K20R-HA                     | Human NIK K20R with C-terminal 1xHA tag                                | GenScript#SC1625            |
| pcDNA3.1 (+)- NIK-Myc                         | Human NIK with C-terminal 1xMyc tag                                    | Subcloned from SC1200       |
| pShuttle-CMV-SF-NEDD8                         | Human NEDD8 with N-terminal streptavidin & FLAG-tag                    | Dr. Huabo Su Lab            |
| pShuttle-CMV-SF-NEDD8ΔGG                      | Human NEDD8 mutant with N-terminal streptavidin & FLAG-tag             | Dr. Huabo Su Lab            |
| pcDNA3.1 (+)-UBB                              | Human UBB (NM_018955.4)                                                | GenScript OHu04823D         |
| pRK5-HA-Ubiquitin-WT                          | Human N-terminal HA-tagged ubiquitin                                   | Addgene#17608 <sup>6</sup>  |
| PFLAG-CMV-SENP8WT                             | Human wild-type SENP8 with N-terminal FLAG tag                         | Addgene#18066 <sup>7</sup>  |
| PFLAG-CMV-SENP8Mut                            | Human SENP8 C153A with N-terminal FLAG tag                             | Addgene#18717 <sup>7</sup>  |
| pLentiCRISPR V2                               | All-in-one lentiviral vector expressing Cas9 nuclease with U6 promoter | Addgene# 52961 <sup>8</sup> |
| pLentiCRISPR V2 human NAE1 sgRNA1             | sgRNA1: TCAAGGAGCAGAAGTACGAC against human NAE1 exon 1                 | GenScript#SC1805            |
| pLentiCRISPR V2 human NAE1 sgRNA3             | sgRNA3: AGGCGCGGCCATGGCGCAGC against human NAE1 exon1 ATG start site   | GenScript#SC1805            |
| pLentiCRISPR V2 human CUL2 sgRNA1             | sgRNA1: TTTGACGACAATAAAAGCCG against human CUL2 exon 2                 | GenScript#SC1805            |
| pLentiCRISPR V2 human CUL3 sgRNA5             | sgRNA5: GACCTAAAATCATTAACATC against human CUL3 exon 5                 | GenScript#SC1678            |
| pLentiCRISPR V2 mouse Cul1 sgRNA1             | sgRNA1: GTTCGCCGTGAATGTGATGA against mouse Cul1 exon 3                 | GenScript#SC1805            |
| pLentiCRISPR V2 mouse Cul1 sgRNA2             | sgRNA2: TTCGTCCTTCATCACATTCA against mouse Cul1 exon 3                 | GenScript#SC1805            |
| pLentiCRISPR V2 mouse Cul4a sgRNA4            | sgRNA4: GCTCTACAAGCAGCTGCGCC against mouse Cul4a exon 3                | GenScript#SC1805            |
| pLentiCRISPR V2 human RBX2 (gene RNF7) sgRNA2 | sgRNA2: CCACCGCGTTCCACTTCTTG against human RBX2 exon 1                 | GenScript#SC1805            |
| pMD2.G VSV G                                  | VSV-G envelope expressing plasmid                                      | Addgene# 12259              |
| psPAX2                                        | 2nd generation lentiviral packaging plasmid                            | Addgene# 12260              |



**Supplementary Table 4. Summary of DsiRNA and siRNA sequences.**

| <b>Gene name</b> | <b>Sequences</b>                                                                                                         | <b>Sources</b>                    |
|------------------|--------------------------------------------------------------------------------------------------------------------------|-----------------------------------|
| Human SENP8      | Seq 1: rUrCrArUrUrArCrCrArCrArCrUrUrGrCrUrArArArArGTA<br>Seq 2: rUrArCrUrUrUrUrUrArGrCrArArGrUrGrUrGrUrArArUrGrArGrA     | IDT DsiRNA#1:<br>hs.Ri.SENP8.13.2 |
| Human SENP8      | Seq 1: rArGrArCrUrUrUrUrCrUrUrArUrUrGrUrArUrArUrArATT<br>Seq 2: rArArUrUrArUrArUrArCrCrArArUrArArGrArArArArGrUrCrUrUrA   | IDT DsiRNA#2:<br>hs.Ri.SENP8.13.3 |
| Human UBC12      | Seq 1: rGrArCrGrUrGrUrGrArUrArUrCrArGrCrUrUrCrUrCrArGAT<br>Seq 2: rArUrCrUrGrArGrArArGrCrUrGrArUrArUrCrArCrArCrGrUrCrUrU | IDT DsiRNA:<br>CD.Ri.390331.13.1  |
| Human NEDD8      | GACAGCAGCTGATTACAAG                                                                                                      | Sigma siRNA #1                    |
| Human NEDD8      | TATATGATGCCTCATTATG                                                                                                      | Sigma siRNA #2                    |

## Supplementary Figures and Legends

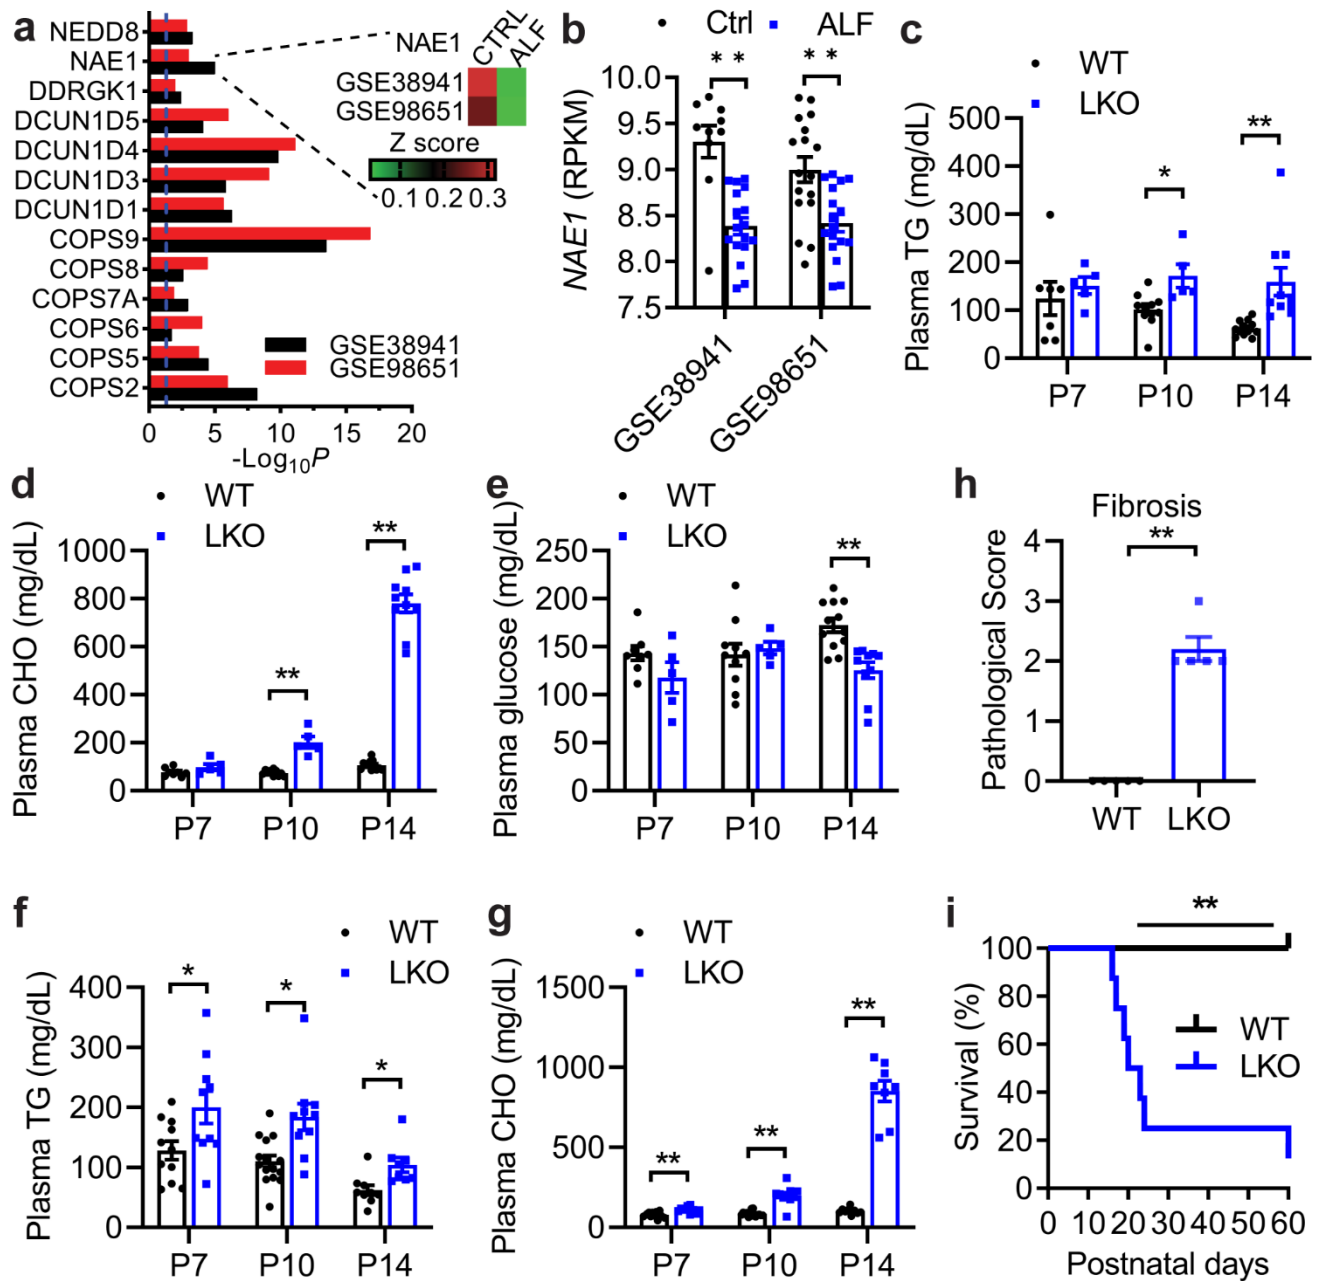

**Fig. S1. Embryonic onset, hepatocyte-specific deletion of NAE1 causes rapid progressive liver injury and premature death.**

**a** Bar graph showing differentially expressed genes related to neddylation ( $-\text{Log}_{10}P > 1.3$ , dashed line) in patients with HBV-associated acute liver failure (ALF) relative to healthy control (Ctrl) individuals from two GSE datasets (GSE38941 in black and GSE98651 in red) obtained from

the NCBI GEO database. Insert indicates the heatmap of *NAE1* expression in both datasets. Two-sided unpaired t-test. **b** Distribution of human *NAE1* expression (RPKM) in Ctrl (black) and ALF (blue) groups from two GSE datasets, respectively. **c** Plasma triglyceride (TG), **d** cholesterol (CHO) and **e** glucose levels at postnatal (P)7 (WT:  $n = 7$ ; LKO:  $n = 5$ ), P10 (WT:  $n = 10$ ; LKO:  $n = 5$ ) and P14 (WT:  $n = 12$ ; LKO:  $n = 10$ ) in male WT and LKO mice. **f** Plasma TG and **g** CHO levels at P7 (WT:  $n = 11$ ; LKO:  $n = 10$ ), P10 (WT:  $n = 15$ ; LKO:  $n = 10$ ) and P14 (WT:  $n = 9$ ; LKO:  $n = 8$ ) in female WT and LKO mice. Multiple unpaired t-tests with the Holm-Sidak method in (**b-g**).  $*P < 0.05$ ,  $**P < 0.005$ . **h** Pathological scores of liver fibrosis based on Sirius red staining at P14 in female WT and LKO livers ( $n = 5$  per group). Unpaired t-tests, two-tailed.  $**P < 0.0001$ . **i** Survival curves of female WT ( $n = 7$ ) and LKO ( $n = 8$ ) mice during the monitoring period as indicated. Log-rank (Mantel-Cox) test.  $**P = 0.0009$ . In (**c-i**), WT (black), LKO (blue). All quantitative data were presented as mean  $\pm$  SEM. Quantitative source data are provided as a Source Data file.

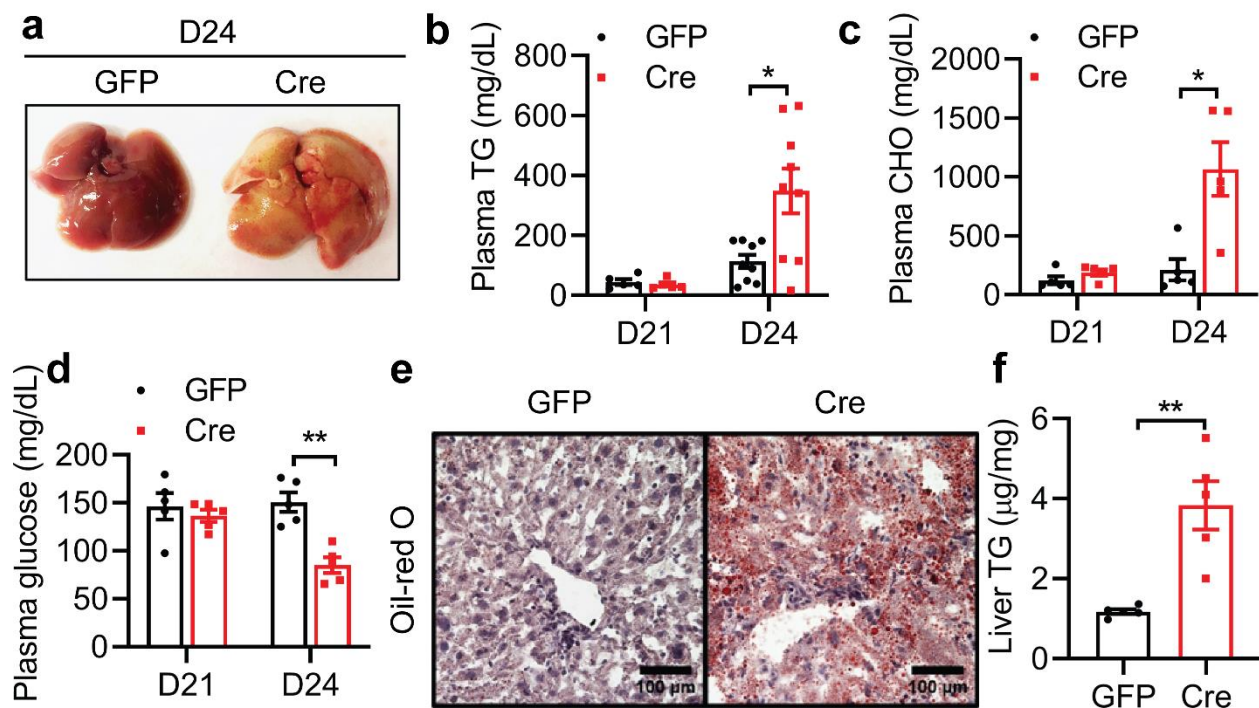

**Fig. S2. Adult-onset, hepatocyte-specific deletion of NAE1 causes rapid progressive liver injury and premature death.**

**a** Gross morphology of livers from D24 GFP and Cre mice. **b** Plasma TG, **c** cholesterol (CHO) and **d** glucose levels in male *Nae1<sup>ff</sup>* mice at D21 ( $n = 5$  per group) and D24 (GFP:  $n = 5$ ; Cre:  $n = 5-9$ ) post-injection of AAV8-TBG-Cre (AAV-Cre, a.k.a. Cre) or AAV8-TBG-eGFP (AAV-GFP, a.k.a. GFP). In (**b-d**), Multiple t-tests with the Holm-Sidak method.  $*P < 0.05$ ,  $**P < 0.005$ . **e** Representative Oil Red O staining and **f** enzymatic quantification of liver TG contents as normalized to tissue weights in male GFP and Cre mice at D24 post virus injections ( $n = 5$  per group). Scale bar: 100  $\mu\text{m}$ . Unpaired t-tests, two-tailed.  $**P = 0.0024$ . GFP: black; Cre: red. All quantitative data were presented as mean  $\pm$  SEM. Quantitative source data are provided as a Source Data file.

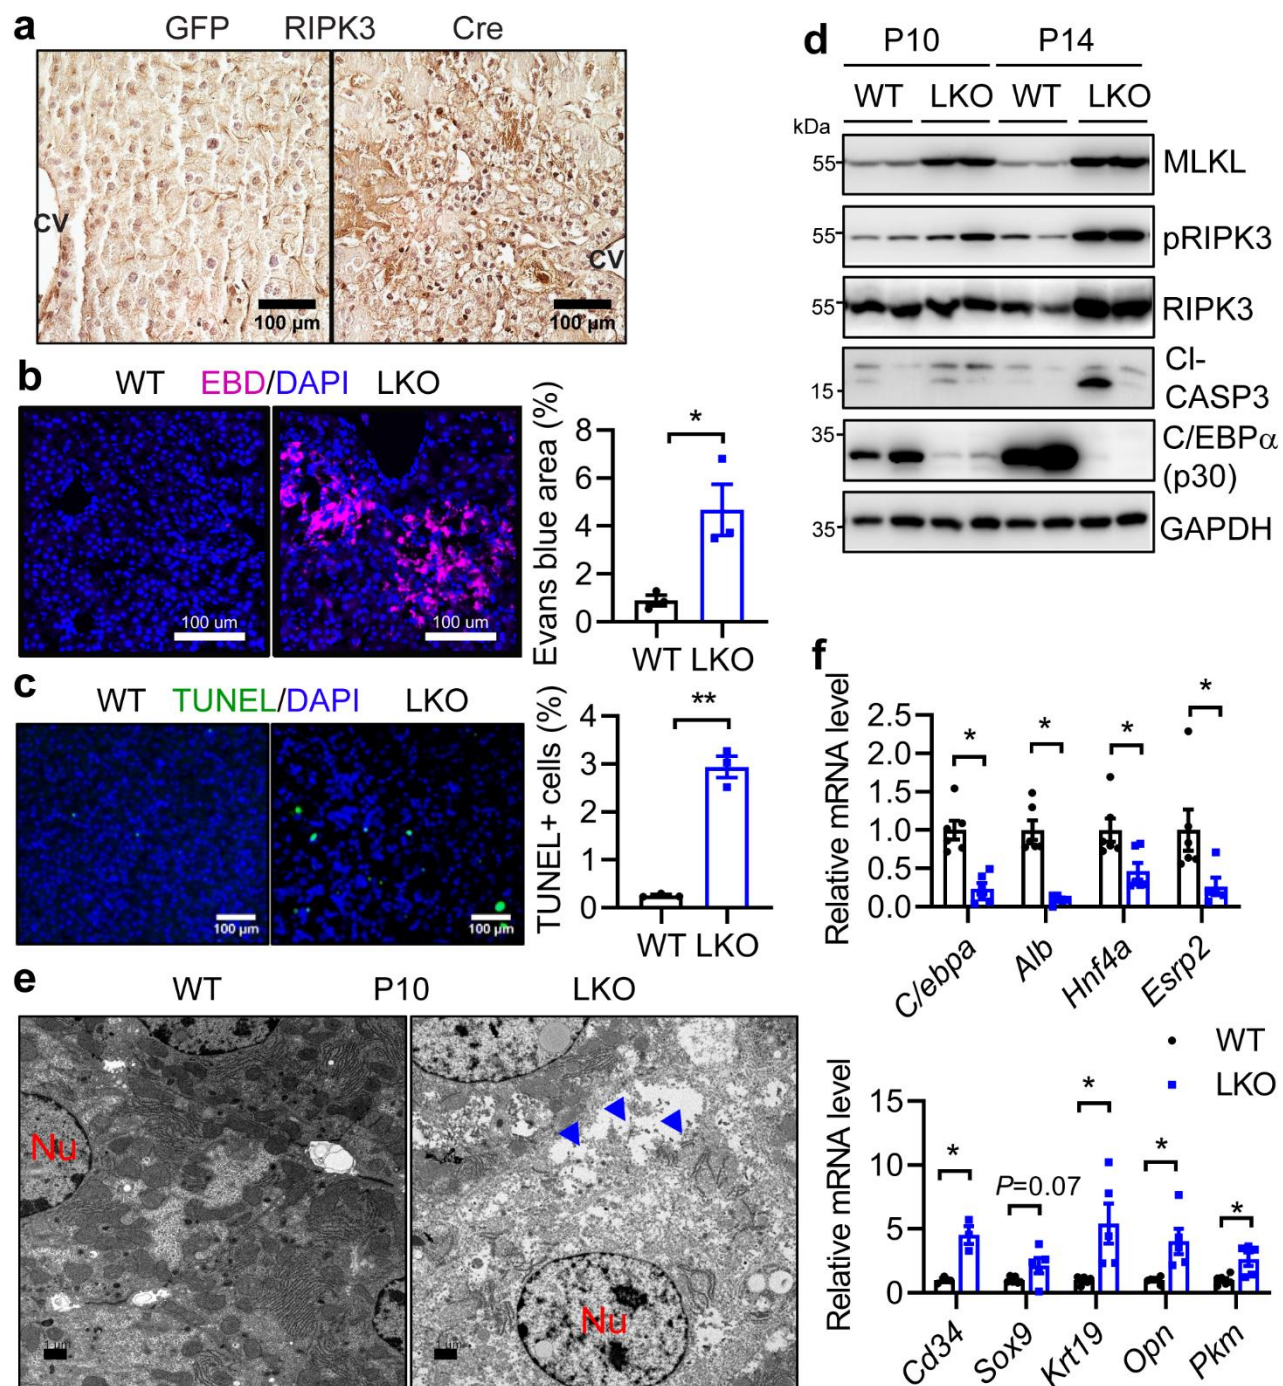

**Fig. S3. Hepatocyte cell death and aberrant fetal reprogramming in mice with adult-onset and embryonic-onset hepatocyte-specific deletion of NAE1.**

**a** Representative immunohistochemistry of RIPK3 in livers from D24 AAV-GFP (GFP) and AAV-Cre (Cre) mice ( $n = 3$  per group). Scale bar: 100  $\mu\text{m}$ . CV: central vein. **b** Evans blue dye (EBD) staining and quantification of total EBD<sup>+</sup> areas ( $*P = 0.0255$ ); **c** TUNEL labeling and quantification

of TUNEL<sup>+</sup> cells (\*\**P* = 0.0003) in livers of P14 *Nae1<sup>ff</sup>* (WT) and *Nae1<sup>ff</sup>; Alb-Cre+* (LKO) mice (*n* = 3 per group). Scale bar: 100 μm. Two-tailed unpaired t-tests in **(b-c)**. **d** Representative Western blot analysis in P10 and P14 liver extracts (*n* = 4 per group). **e** Representative TEM micrographs of P10 WT and LKO livers from four biologically independent samples. Blue arrowheads indicate ruptured membranes representing cells undergoing necroptosis. Nu, nucleus. Scale bar: 1 μm. **f** Relative mRNA levels of mature hepatocyte markers and BEC/progenitor-specific markers in livers of P14 male WT and LKO mice (*n* = 6 per group). Multiple unpaired t-tests with the Holm-Sidak method. \**P* < 0.05, \*\**P* < 0.005. WT (black); LKO (blue). All quantitative data were presented as mean ± SEM. Quantitative source data are provided as a Source Data file. Uncropped gels are provided in the Supplementary file.



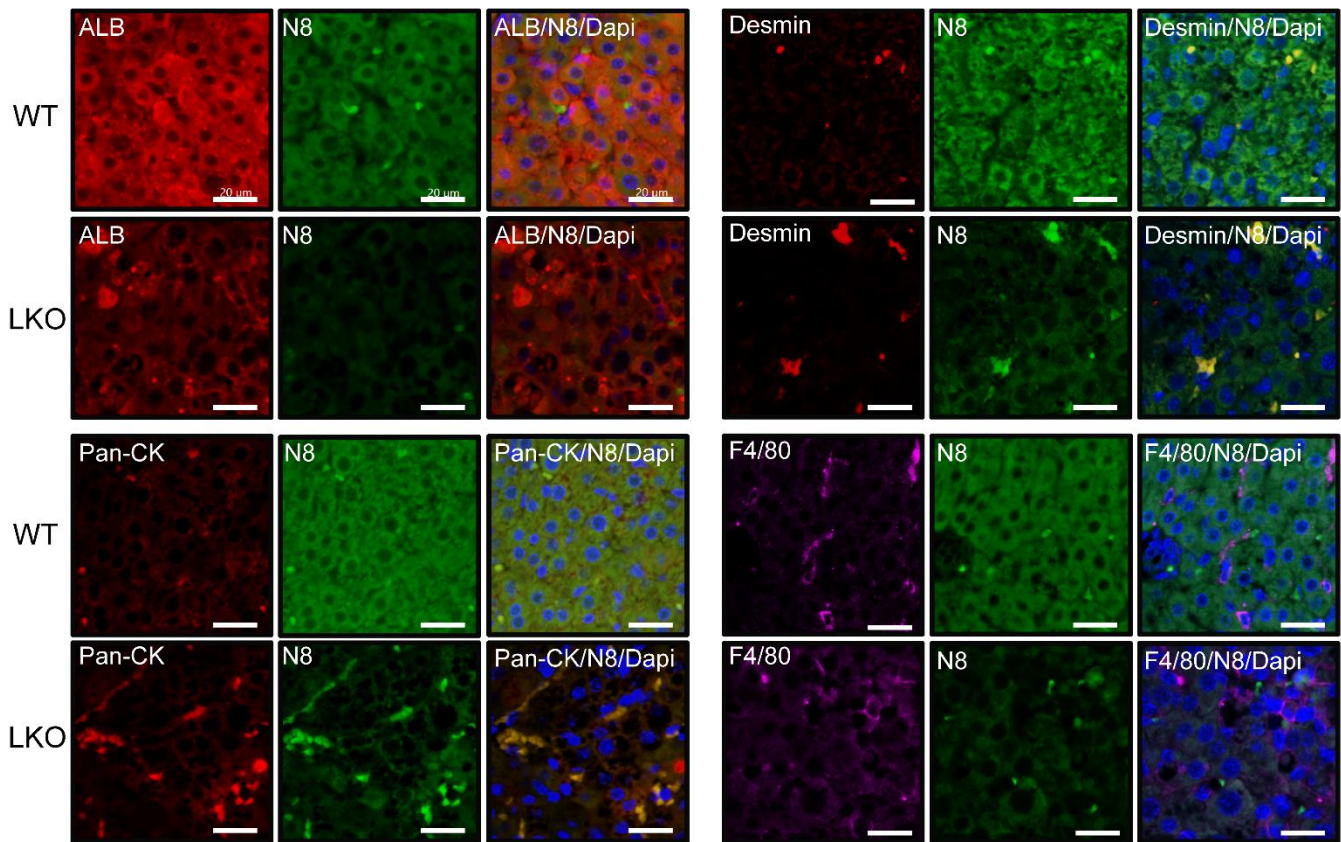

**Fig. S4. Aberrant fetal reprogramming and neddylation patterns in mouse livers with embryonic-onset deletion of NAE1.**

Representative individual and merged immunofluorescence for Albumin (ALB), a hepatocyte marker; Desmin, a hepatic stellate cell marker; Cytokeratin (Pan-CK), BEC/progenitor cell marker, F4/80, secreted by activated Kupffer cells, with NEDD8 (N8) in male P14 *Nae1<sup>ff</sup>* (WT) and *Nae1<sup>ff</sup>; Alb-Cre<sup>+</sup>* (LKO) mice liver, respectively. Scale bar: 20  $\mu$ m.  $n = 3$  biologically independent samples.

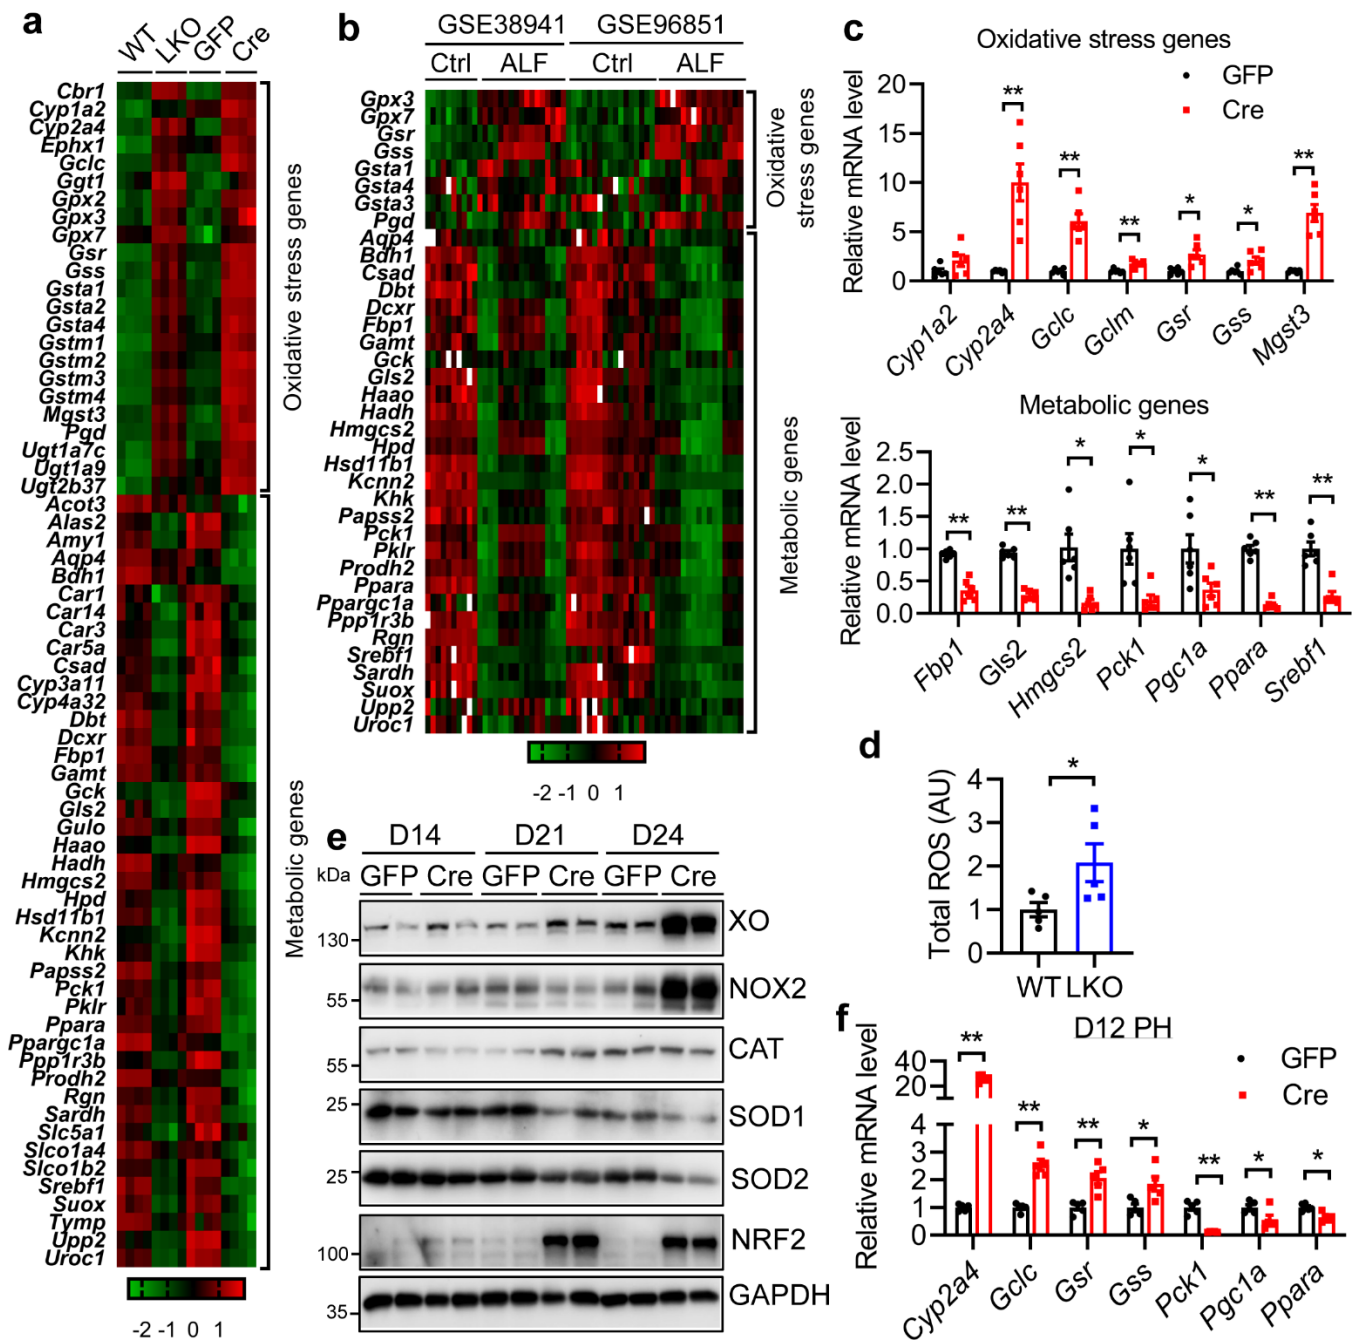

**Fig. S5. Hepatocyte-specific neddylation deficiency causes oxidative stress and mitochondrial dysfunction.**

**a** Heatmap presentation of DEGs related to oxidative stress and metabolism in livers from male LKO and Cre mice as compared to WT and GFP counterparts, respectively. **b** Heatmap presentation of DEGs related to oxidative stress and metabolism in human livers from Ctrl and



ALF patients obtained from GSE3899941 and GSE96851, respectively. **c** qRT-PCR confirmation of mRNA changes of major DEGs in oxidative stress and metabolism pathways in livers of D21 GFP (black) and Cre (red) mice ( $n = 6$  per group). Multiple unpaired t-tests with the Holm-Sidak method.  $*P < 0.05$ ,  $**P < 0.005$ . **d** ROS levels were measured by incubating liver homogenates with a DCFH-DA probe and expressed as AU from male P10 WT (black) and LKO (blue) mice ( $n = 5$  per group). Unpaired t-tests, two-tailed,  $*P = 0.0487$ . **e** Representative Western blot in liver extracts of D14, D21, and D24 GFP and Cre mice ( $n = 4$  per group). **f** Relative mRNA levels of indicated genes in primary hepatocytes (PH) isolated from livers of D12 GFP (black) and Cre (red) mice ( $n = 5$  per group). Three biologically independent experiments. Multiple t-tests with the Holm-Sidak method.  $*P < 0.05$ ,  $**P < 0.005$ . All quantitative data were presented as mean  $\pm$  SEM. Quantitative source data are provided as a Source Data file. Uncropped gels are in the Supplementary file.

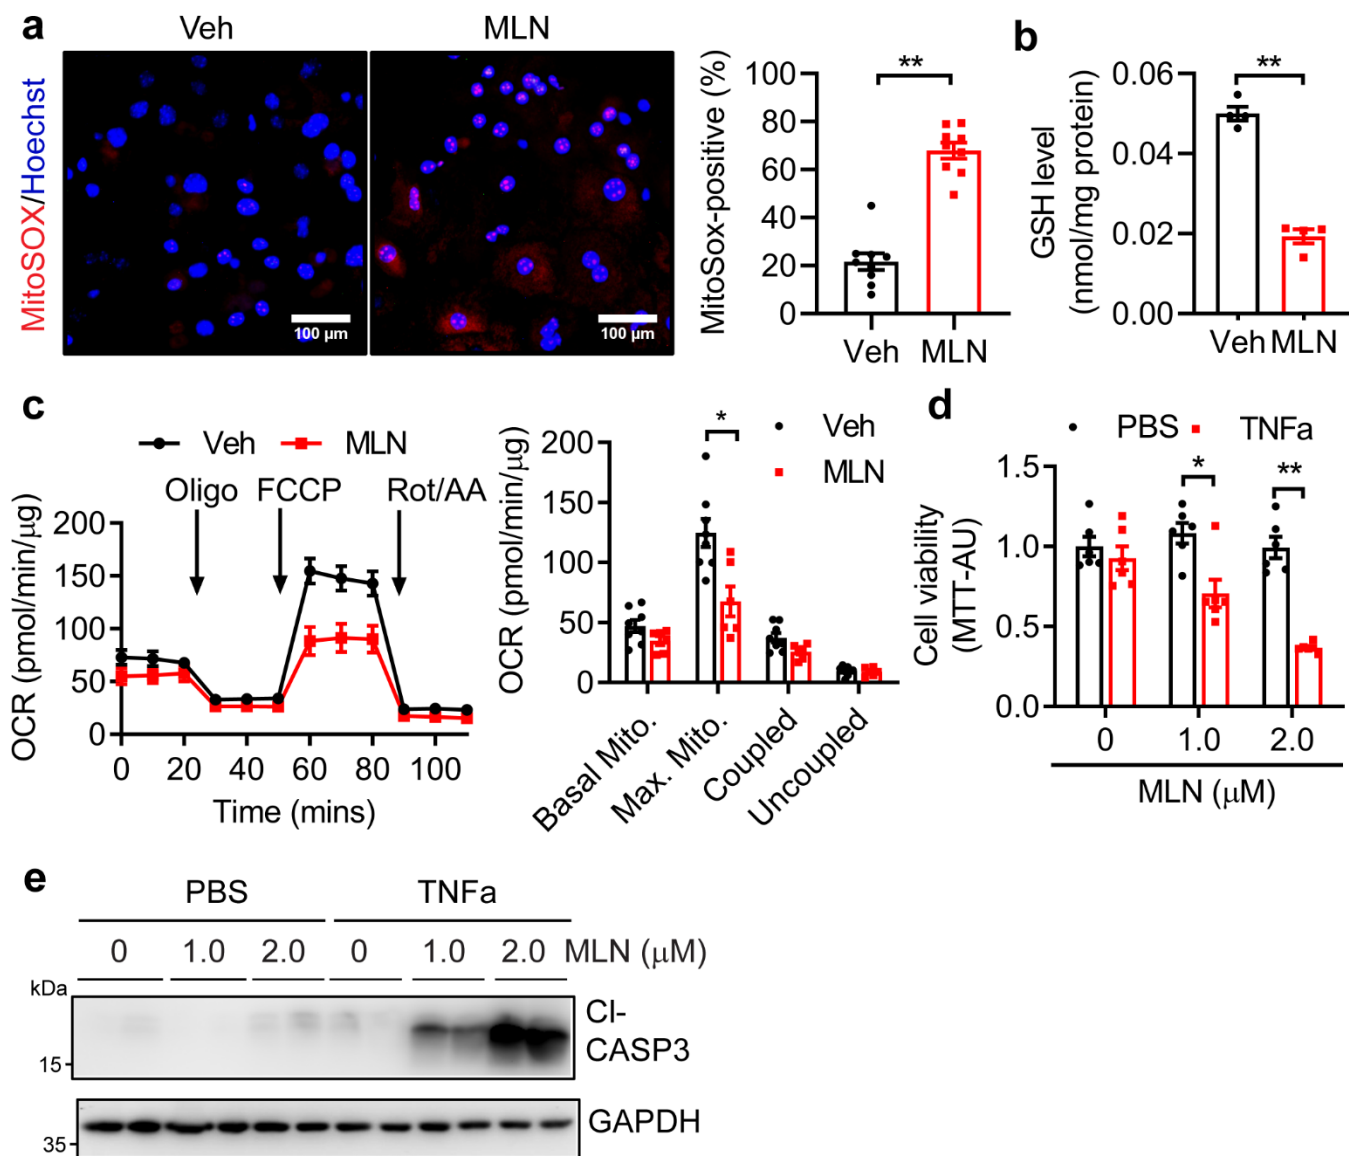

**Fig. S6. Neddylolation inhibition induces oxidative stress and mitochondrial dysfunction *in vitro*.**

**a-e** All experiments were performed in primary hepatocytes isolated from male C57BL/6J mice treated with vehicle (Veh) or 2.0  $\mu$ M MLN for 48 h. **a** Representative MitoSOX staining and quantification of MitoSOX-positive cells. Scale bar: 100  $\mu$ m. **b** Total GSH levels were measured and normalized to protein amounts ( $n = 4$ ). **a-b**: Unpaired t-tests, two-tailed. **c** Oxygen consumption rate (OCR) was detected using a Seahorse XF Cell Mito Stress Test. Basal,

maximal (Max.), coupled, and uncoupled mitochondrial (Mito.) respirations were shown in the right panel. **d** Cell viability was determined by MTT assays and expressed as arbitrary units (AU) ( $n = 6$  per group). Multiple unpaired t-tests with the Holm-Sidak method in **c-d**. **e** Representative Western blot of indicated proteins in primary hepatocytes treated with Veh or indicated concentrations of MLN for 48 h with or without 20 ng/mL TNF $\alpha$  in the last 24 h Veh (black), MLN (red). Representative data from three biologically independent experiments were shown for **a-e**. \* $P < 0.05$ , \*\* $P < 0.005$ . All quantitative data were presented as mean  $\pm$  SEM. Quantitative source data are provided as a Source Data file. Uncropped gels are provided in the Supplementary file.

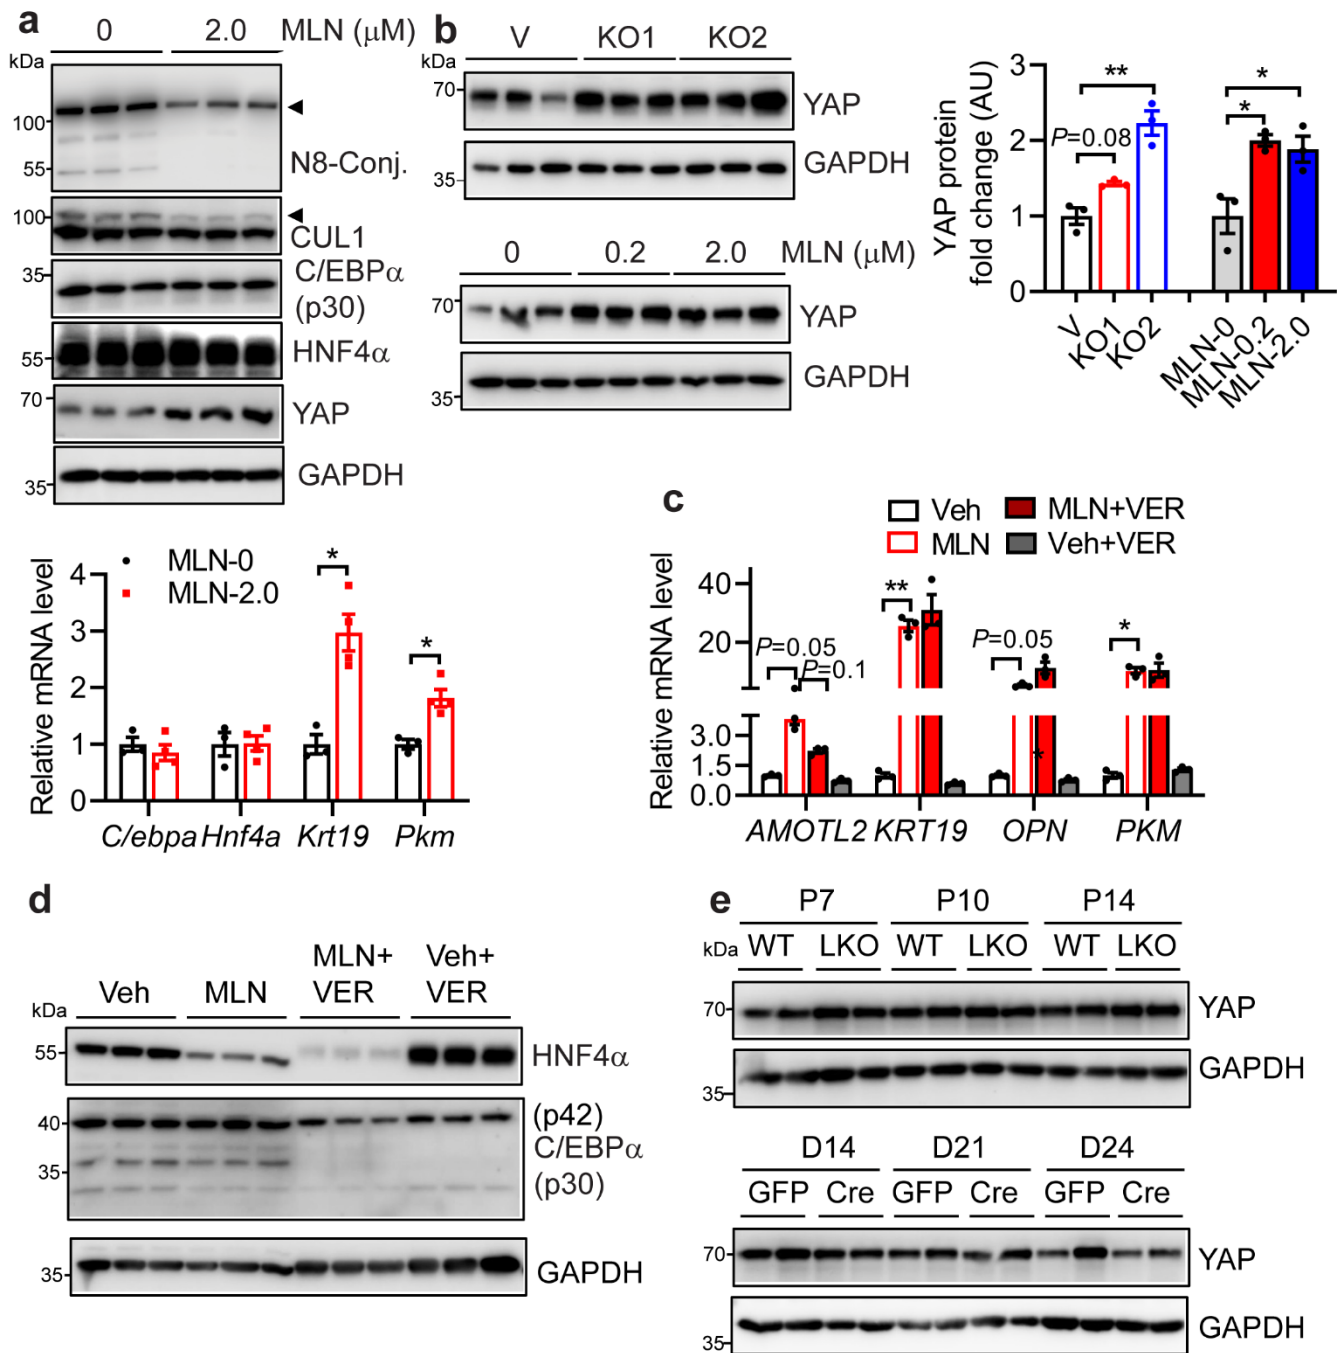

**Fig. S7. Neddylation deficiency-induced hepatocyte fetal reprogramming is independent of YAP activation.**

**a** Representative Western blot and relative mRNA levels of indicated genes in primary hepatocytes (PH) isolated from male C57BL/6 mice and treated with 0 ( $n = 3$  per group) and 2.0  $\mu\text{M}$  MLN ( $n = 4$  per group) for 96 h. Multiple unpaired t-tests with the Holm-Sidak method.  $*P <$

0.05. MLN-0: black; MLN-2.0: red. **b** Representative Western blot and quantification of YAP in NAE1 KO1 and KO2 HepG2 cells and MLN-treated HepG2 cells at indicated concentrations for 48 h ( $n = 3$  per group). One-way ANOVA followed by Tukey's multiple comparisons test.  $*P < 0.05$ . **c** Relative mRNA levels of indicated genes ( $n = 3$  per group), and **d** Western blot of indicated proteins in HepG2 cells treated with vehicle (Veh) or 2.0  $\mu\text{M}$  MLN in the presence or absence of 10  $\mu\text{M}$  Verteporfin (VER) for 48 h ( $n = 3$  per group). Two-way ANOVA followed by Tukey's multiple comparisons test.  $*P < 0.05$ ,  $**P < 0.005$ . Two biologically independent experiments for **a-d**. **e** Western blot of YAP in livers of male *Nae1<sup>ff</sup>* (WT) and *Nae1<sup>ff</sup>; Alb-Cre+* (LKO) or AAV-GFP (GFP) and AAV-Cre (Cre) mice at indicated ages or days post virus injections ( $n = 4$  per group). All quantitative data were presented as mean  $\pm$  SEM. Quantitative source data are provided as a Source Data file. Uncropped gels are provided in the Supplementary file.

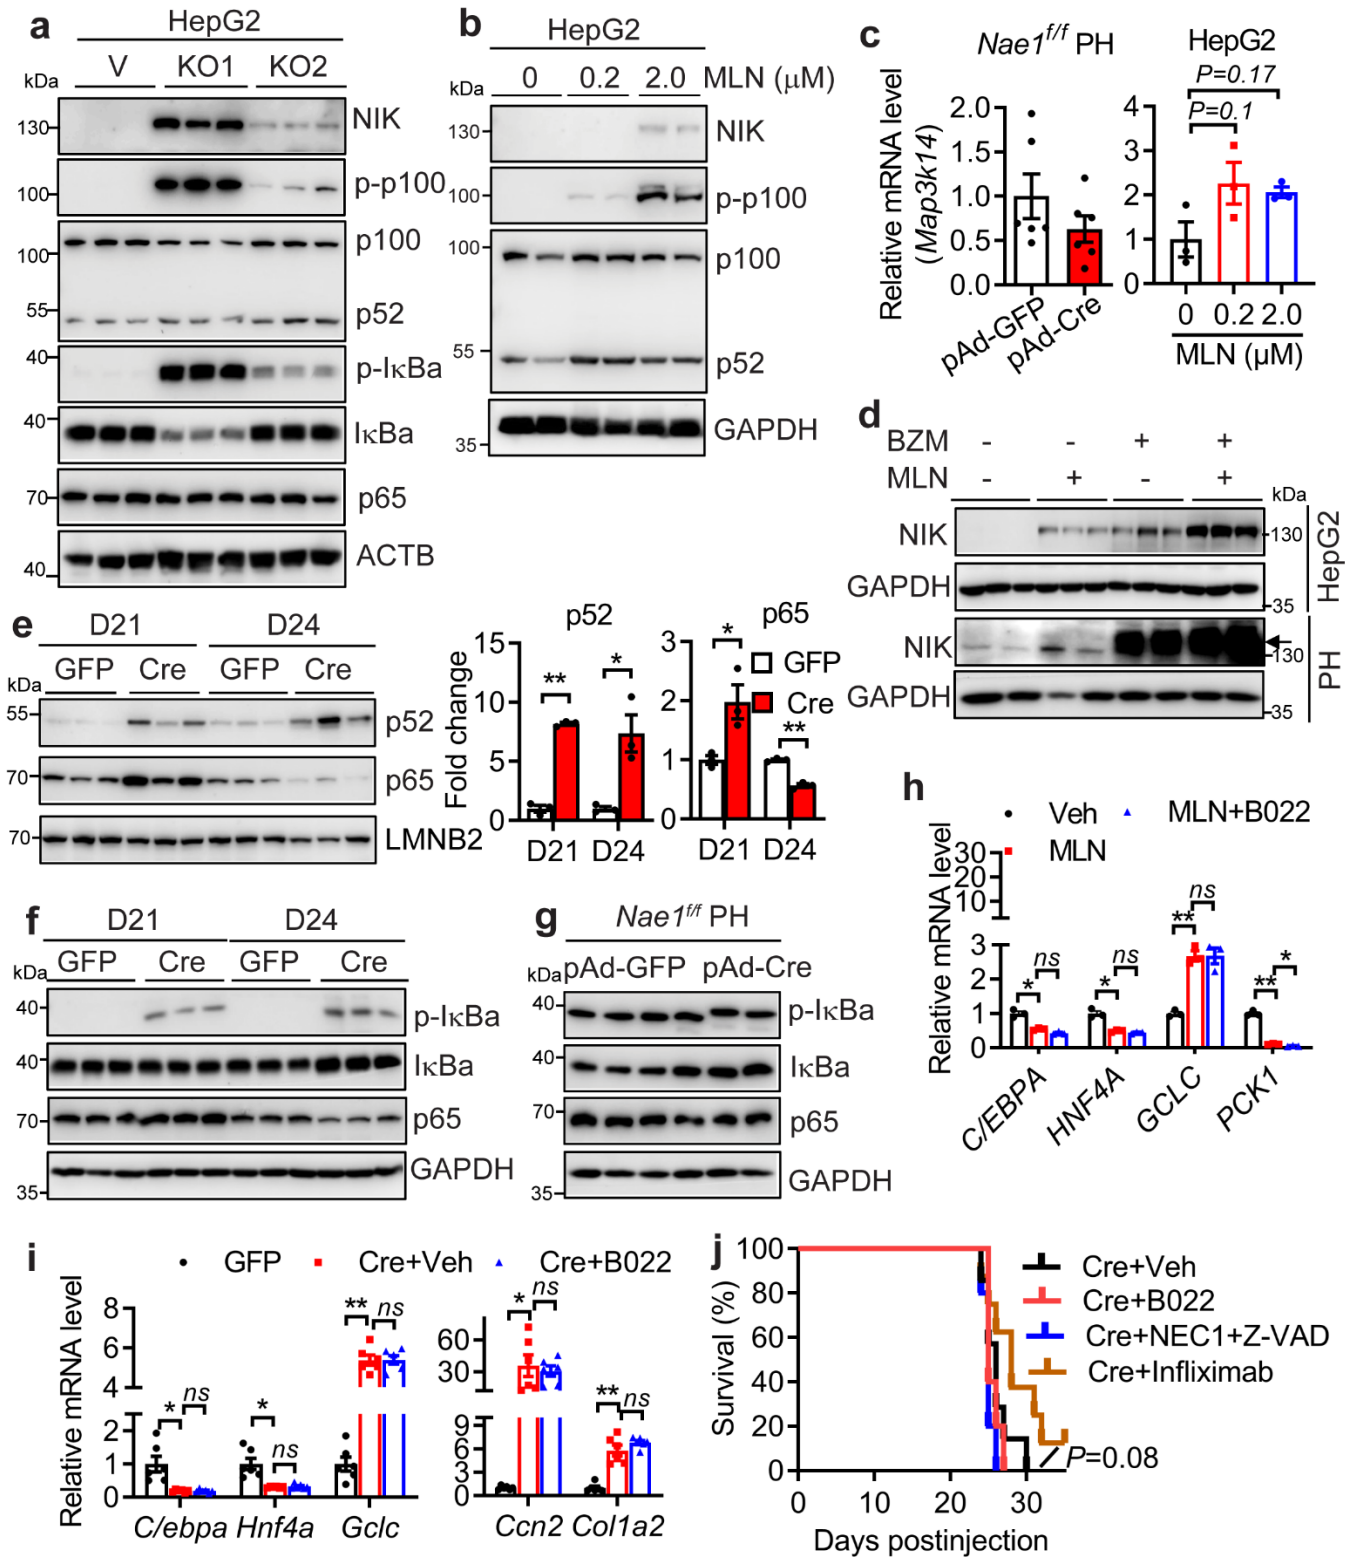

**Fig. S8. Hepatic neddylation deficiency promotes NIK protein expression.**

**a** Western blot in HepG2 cells after infection with pLentiCRISPR/Cas9 lentiviruses bearing two specific human *NAE1* sgRNAs (KO1 and KO2). Cells infected with viruses expressing no sgRNA and selected with puromycin were used as a vector control (V). **b** Western blot in MLN-treated HepG2 cells at indicated concentrations for 48 h. **c** NIK (gene name: *Map3k14*) mRNA expression in mouse *Nae1<sup>ff</sup>* primary hepatocytes (PH) at 48 h after infection with pAd-GFP and pAd-Cre ( $n = 6$ ) and MLN-treated HepG2 cells at indicated concentrations for 48 h ( $n = 3$ ). Unpaired t-tests, two-tailed. **d** Western blot of endogenous NIK in HepG2 and primary hepatocytes treated with 2.0  $\mu$ M MLN for 60 h with or without 100 nM BZM in the final 12 h. **a-d**: Three biologically independent experiments. **e** Western blot and quantification in liver nuclear extracts of AAV-GFP (GFP, white bar) and AAV-Cre (Cre, red bar) mice at D21 and D24 post-virus injections ( $n = 3$  per group). Multiple unpaired t-tests with the Holm-Sidak method.  $*P < 0.05$ ;  $**P < 0.005$ . **f-g** Western blot in **(f)** liver extracts of AAV-GFP and AAV-Cre mice at D21 and D24 post-virus injections, ( $n = 3$  per group), and **(g)** in wild-type primary hepatocytes at 48 h after infection with pAd-GFP and pAd-Cre ( $n = 6$  per group). **h** qRT-PCR analyses in HepG2 cells treated with vehicle (Veh), 1.0  $\mu$ M MLN with or without 5  $\mu$ M B022 for 48 h ( $n = 3$  per group). **i** Relative mRNA levels in livers from male D24 AAV-GFP, AAV-Cre receiving Veh or B022 mice (GFP: black,  $n = 6$ ; Cre+Veh: red,  $n = 6$ ; Cre+B022: blue,  $n = 3$  in duplicates). In **(h-i)**, Two-way ANOVA followed by Tukey's multiple comparisons test.  $*P < 0.05$ ;  $**P < 0.005$ ; ns: not significant. **j** Male *Nae1<sup>ff</sup>* mice injected with AAV-Cre received Veh ( $n = 7$ ), B022 ( $n = 5$ ) or combined Necrostatin 1 (NEC1)/Z-VAD-FMK ( $n = 5$ ) or Infliximab ( $n = 8$ ) via *i.p* injection from D10 post virus injection. Survival curves were analyzed by Log-rank (Mantel-Cox) test. All quantitative data were presented as mean  $\pm$  SEM. Quantitative source data are provided as a Source Data file. Uncropped gels are provided in the Supplementary file.

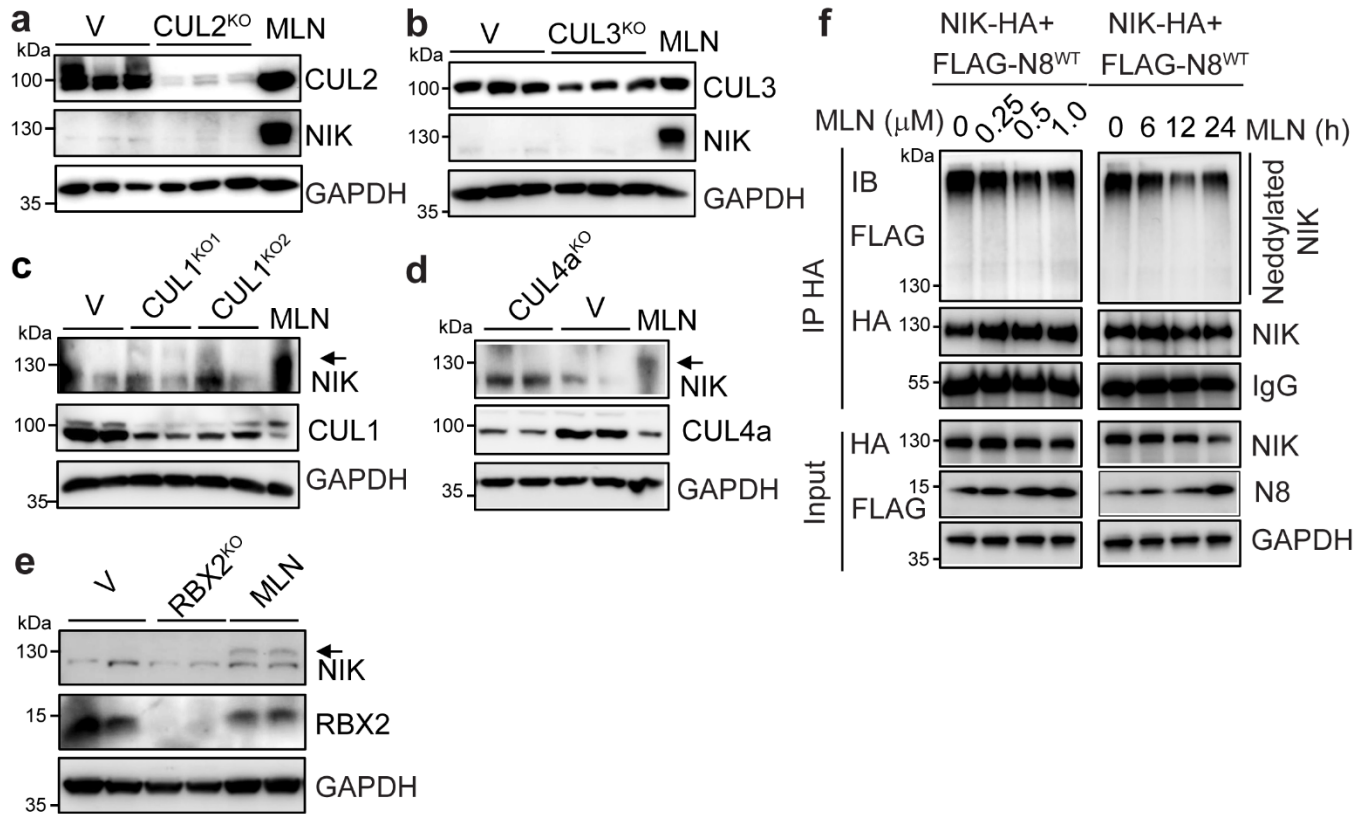

**Fig. S9. Regulation of NIK by CRLs and neddylation.** Western blot analyses in (a-b) HepG2 cells after infection with pLentiCRISPR/Cas9 lentiviruses bearing specific sgRNAs against human CUL2 (CUL2<sup>KO</sup>) and CUL3 (CUL3<sup>KO</sup>), respectively; and (c-d) NIH-3T3 cells after infection with pLentiCRISPR/Cas9 lentiviruses bearing specific sgRNAs against murine CUL1 (CUL1<sup>KO1</sup>, CUL1<sup>KO2</sup>) and CUL4a (CUL4a<sup>KO</sup>), respectively; and (e) in RBX2 (RBX2<sup>KO</sup>) knockout HepG2 cells targeted by CRISPR/Cas9 sgRNA. Cells infected with viruses expressing no sgRNA and selected with puromycin were used as a control (V). HepG2 cells treated with 2.0 μM MLN for 48 h were used as the control for NIK induction. f Twenty-four hours after transient transfection, HepG2 cells co-expressing FLAG-NEDD8 and NIK-HA were treated with indicated concentrations of MLN for 24 hours or 1.0 μM MLN for the indicated periods. The neddylation



levels of NIK were then examined by IB after IP by anti-HA magnetic beads under denaturing conditions. Three independent experiments. Uncropped gels are provided in the Supplementary file.

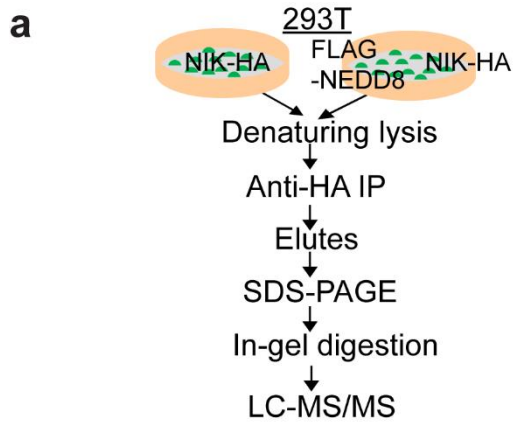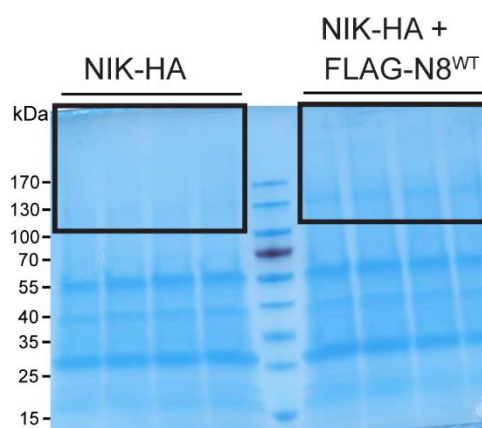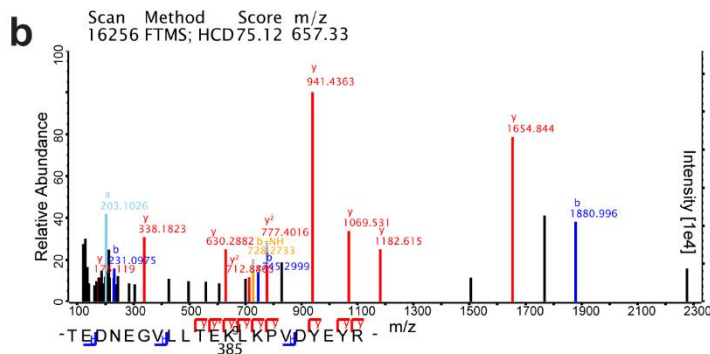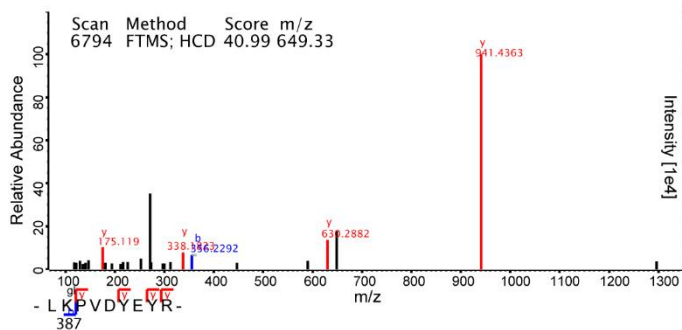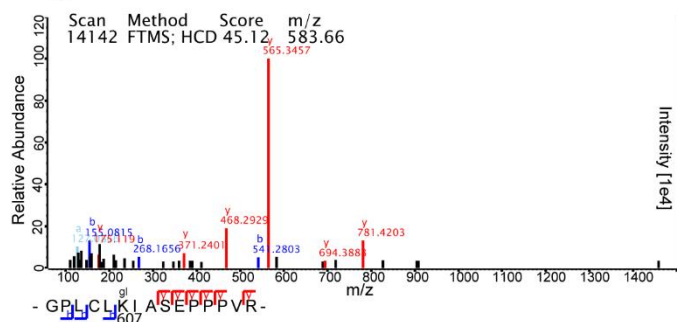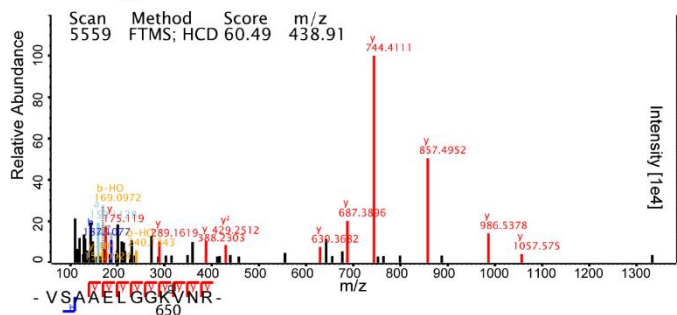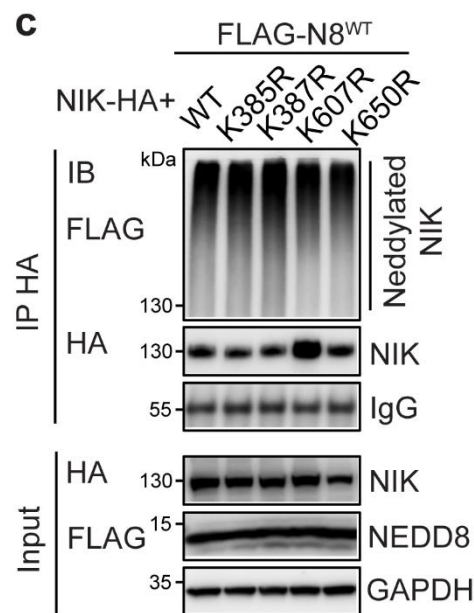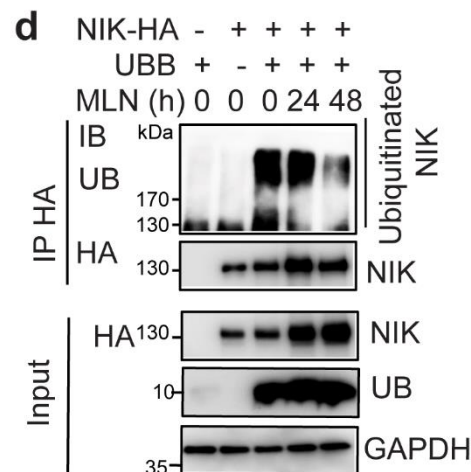

**Fig. S10. Identification of neddylation sites.** **a** HEK293T cells were expressed with NIK-HA alone or NIK-HA and FLAG-N8<sup>WT</sup>. Forty-eight hours after transfection, NIK was immunoprecipitated by anti-HA magnetic beads under denaturing conditions. Elutes were resolved on SDS-PAGE and stained with Coomassie blue. Gels at NIK and upper were cut and subject to in-gel trypsin digestion followed by Nano LC-MS/MS. **b** Identification of K385, K387, K607, and K650 as neddylation residues. Shown were LC-MS/MS spectra of modified NIK peptides. **c** HEK293T cells were co-expressed with NIK-HA (WT) and the respective single K385R, K387R, K607R, and K650 mutants together with FLAG-N8<sup>WT</sup>. Forty-eight hours after transfection, the neddylation levels of NIK and its mutants were then examined by IB after IP by anti-HA magnetic beads under denaturing conditions. **d** Twenty-four hours after transfection with the indicated constructs, HepG2 cells were treated with or without 2.0  $\mu$ M MLN for indicated hours. The ubiquitination of NIK-HA was then examined by IB after IP under denaturing conditions. **c-d**: Three independent experiments. Uncropped gels are provided in the Supplementary file.

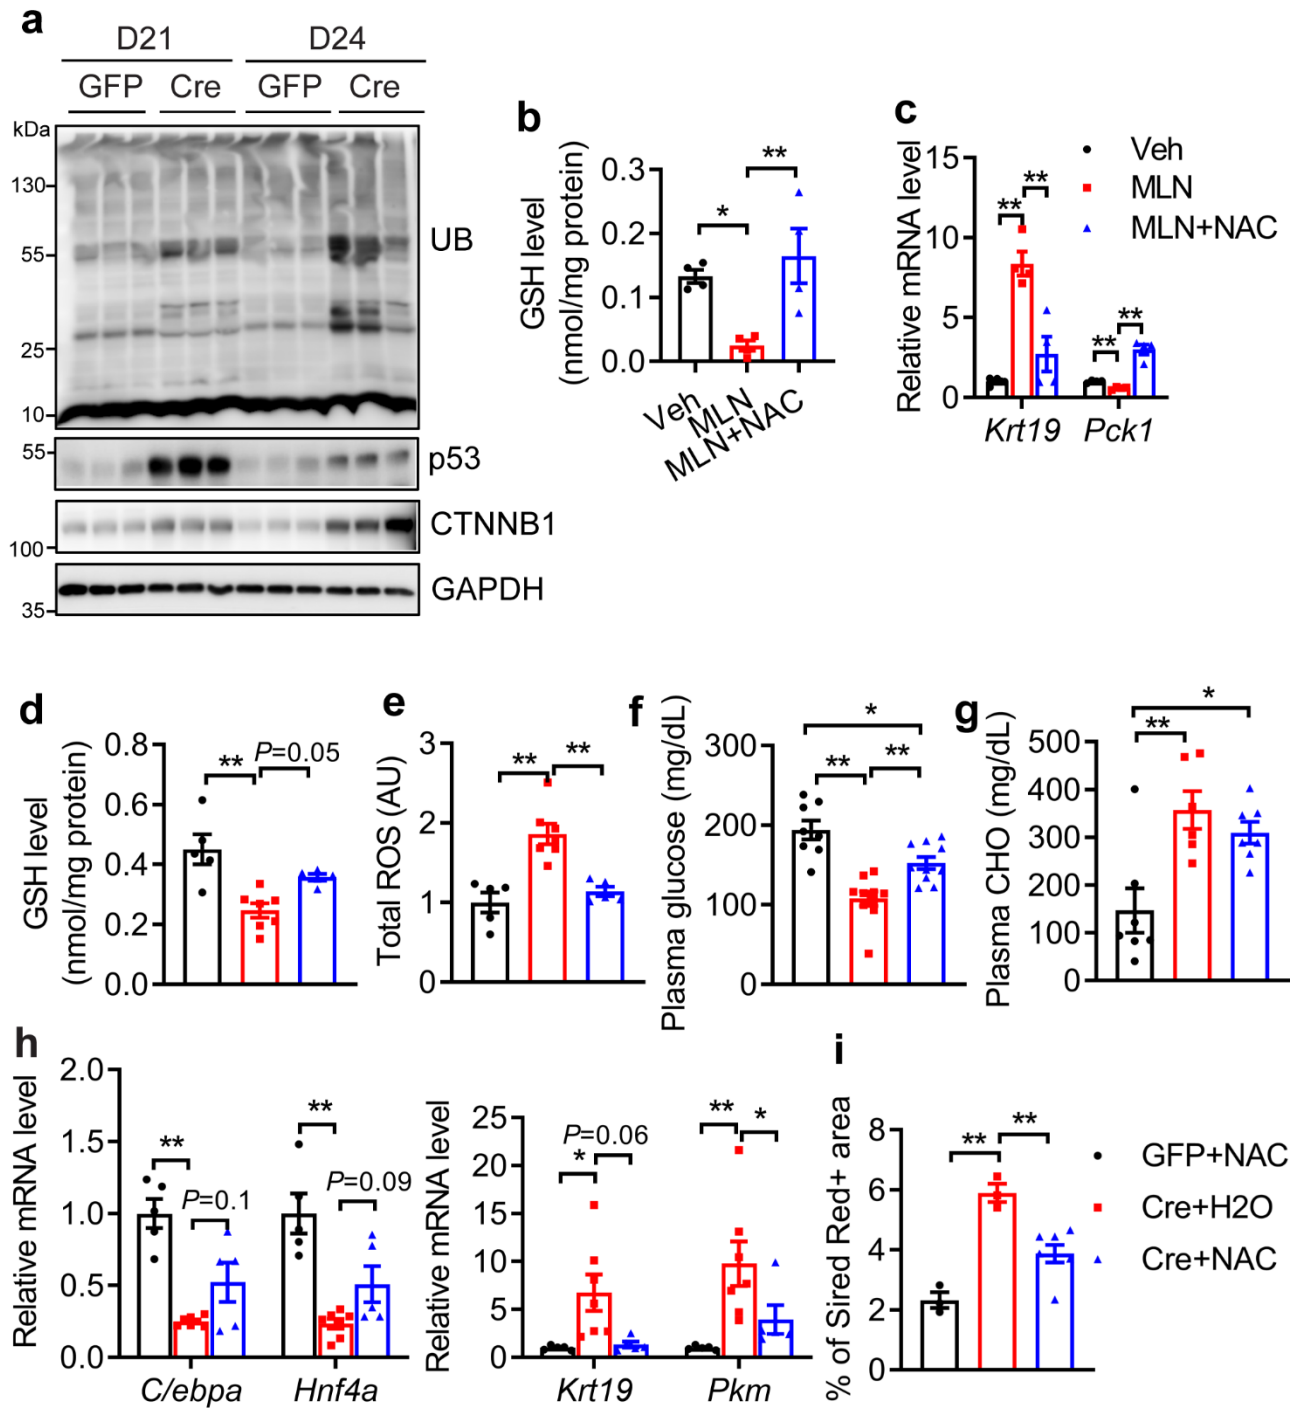

**Fig. S11. NAC ameliorates NAE1 deletion-induced lethal liver failure.**

**a** Western blot in liver extracts of AAV-GFP and AAV-Cre mice at D21 and D24 post-virus injections ( $n = 3$  per group). **b** Total GSH levels were measured in HepG2 cells treated with vehicle (Veh), 2.0  $\mu$ M MLN with or without 10 mM NAC for 48 h. Data were normalized to protein amounts ( $n = 4$  per group). One-way ANOVA followed by Tukey's multiple comparisons test. **c**

qRT-PCR analyses in wild-type primary hepatocytes treated with Veh, 2.0  $\mu$ M MLN with or without 5 mM NAC for 48 h ( $n = 4$  per group). Two-way ANOVA followed by Tukey's multiple comparisons test. In **(b-c)**, three independent experiments.  $*P < 0.05$ ,  $**P < 0.005$ . Veh: black; MLN: red; MLN+NAC: blue. **d-i** *Nae1<sup>ff</sup>* mice injected with AAV-Cre received special drinking water supplemented with 1% NAC (Cre+NAC) or regular water (Cre+H<sub>2</sub>O) from D10 post-virus injection. AAV-GFP mice fed with the same NAC water (GFP+NAC) served as a control. **d** Liver total GSH levels were measured and normalized to protein amounts. **e** ROS levels were measured by incubating liver homogenates with a DCFH-DA probe and expressed as AU. **d-e**: GFP+NAC:  $n = 5$ ; Cre+H<sub>2</sub>O:  $n = 7$ ; Cre+NAC:  $n = 5$ . **f** Plasma glucose (GFP+NAC:  $n = 8$ ; Cre+H<sub>2</sub>O:  $n = 10$ ; Cre+NAC:  $n = 10$ ) and **g** cholesterol (CHO) levels (GFP+NAC:  $n = 7$ ; Cre+H<sub>2</sub>O:  $n = 6$ ; Cre+NAC:  $n = 7$ ). One-way ANOVA followed by Tukey's multiple comparisons test in **(d-g)**. **h** Relative mRNA levels of indicated genes. Two-way ANOVA with Tukey's multiple comparisons test. **i** Quantification of Sirius red+ area in **Fig. 8f** (GFP+NAC:  $n = 3$ ; Cre+H<sub>2</sub>O:  $n = 3$ ; Cre+NAC:  $n = 7$ ). One-way ANOVA with Tukey's multiple comparisons test. **c-i** were performed in male GFP+NAC (black), Cre+H<sub>2</sub>O (red), and Cre+NAC (blue) mice at D24 post-virus injection.  $*P < 0.05$ ,  $**P < 0.005$ . All quantitative data were presented as mean  $\pm$  SEM. Quantitative source data are provided as a Source Data file. Uncropped gels are provided in the Supplementary file.

**Uncropped images:**

Fig. S3d. Protein expression in P10 and P14 WT and LKO livers

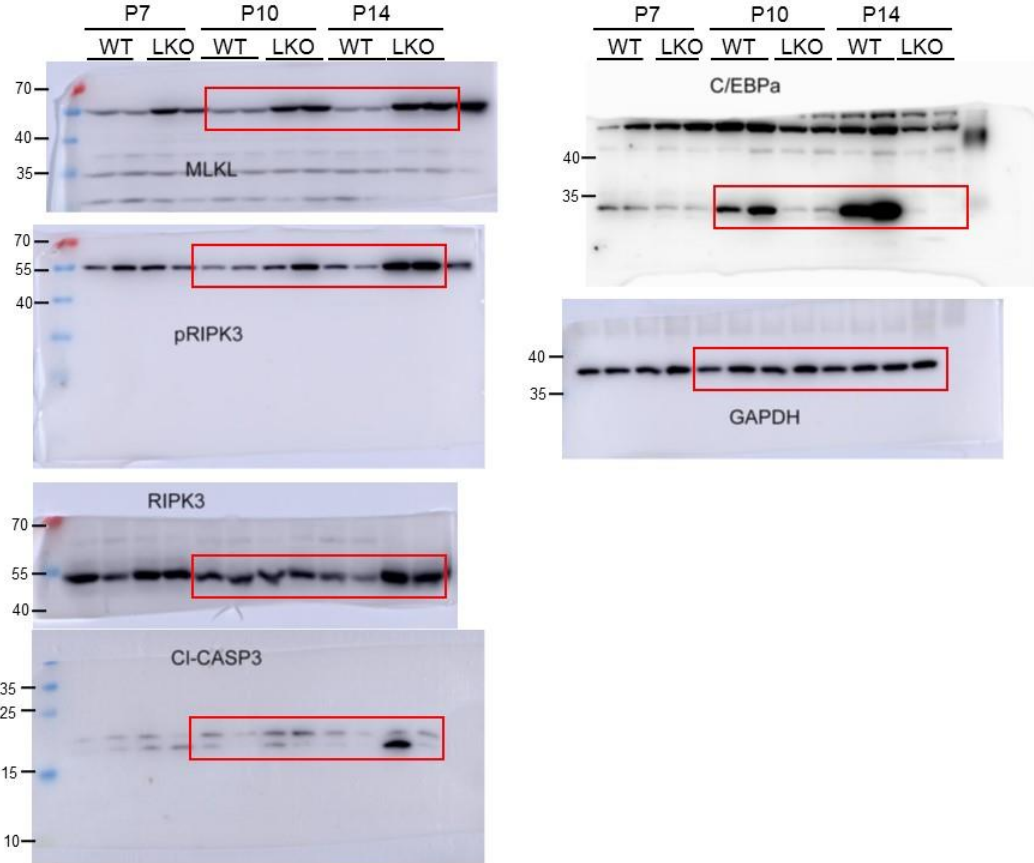

Fig. S5e. Protein expression in D14, 21 and 24 AAV-GFP and AAV-Cre livers

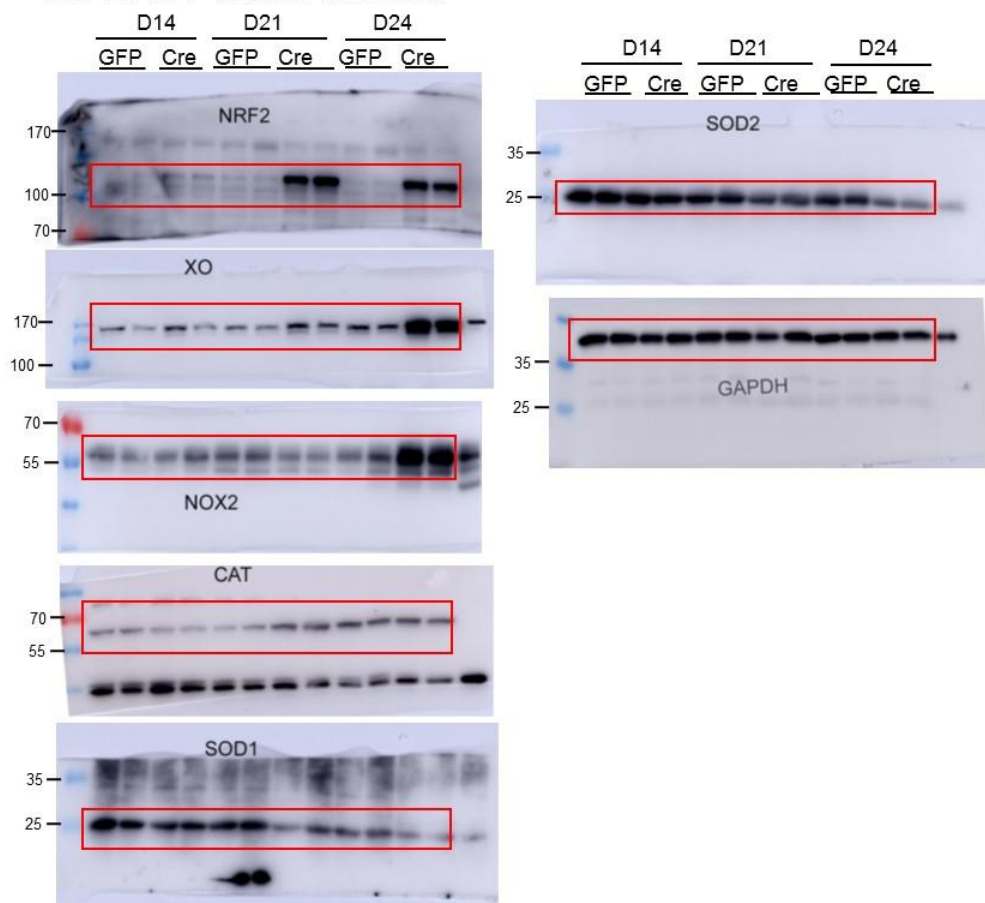

Fig. S6e Protein expression in primary hepatocytes treated with 2.0  $\mu$ M MLN for 48 h with or without TNFa in the last 24 h

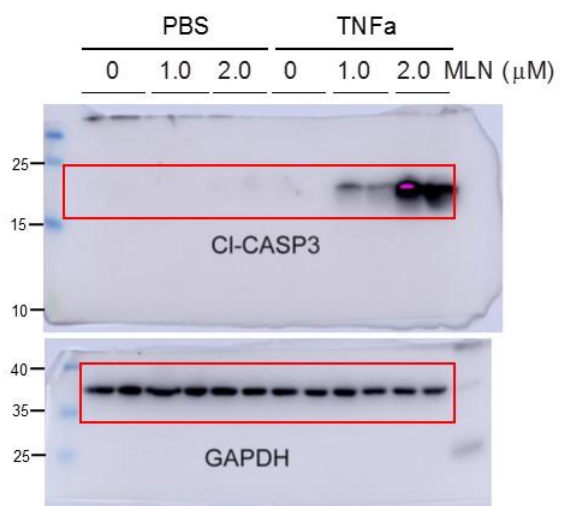

**Fig. S7a. Protein expression in primary hepatocytes treated with 2.0uM MLN for 48 h**

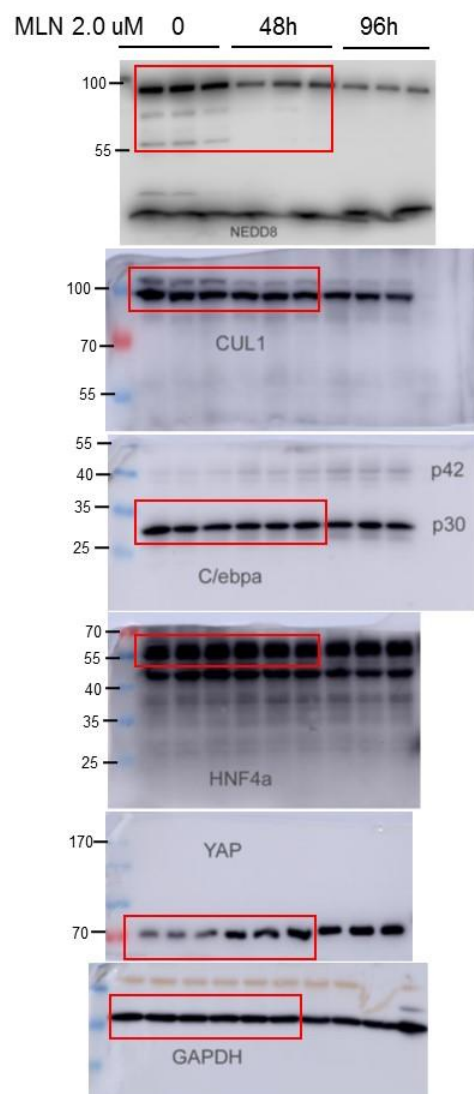



**Fig. S7b. Protein expression in NAE1-deleted or MLN-treated HepG2 cells**

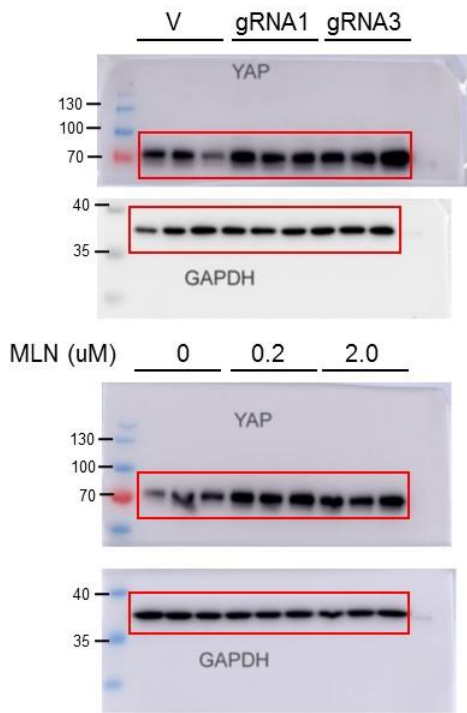

**Fig. S7d. Protein expression in MLN and/or Verteporfin-treated HepG2 cells**

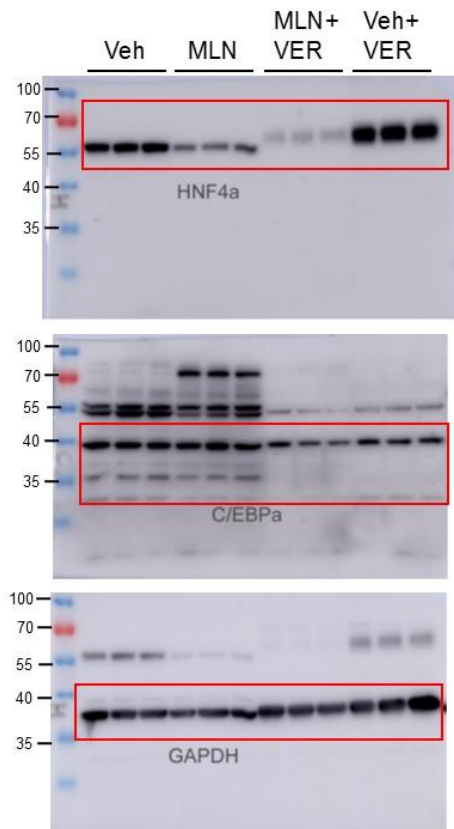

**Fig. S7e. Protein expression neonatal and adult NAE1-deleted livers.**

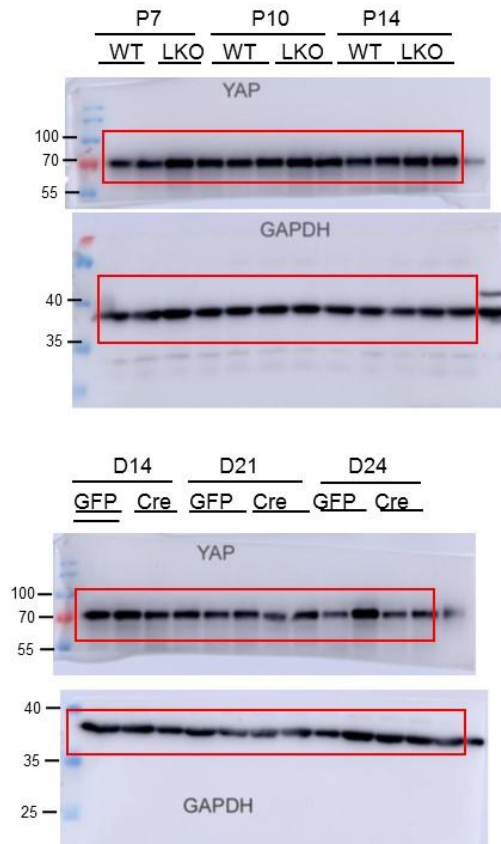

**Fig. S8a Non-canonical and canonical NF- $\kappa$ B signaling in NAE1-deleted HepG2 cells by CRISPR/Cas9**

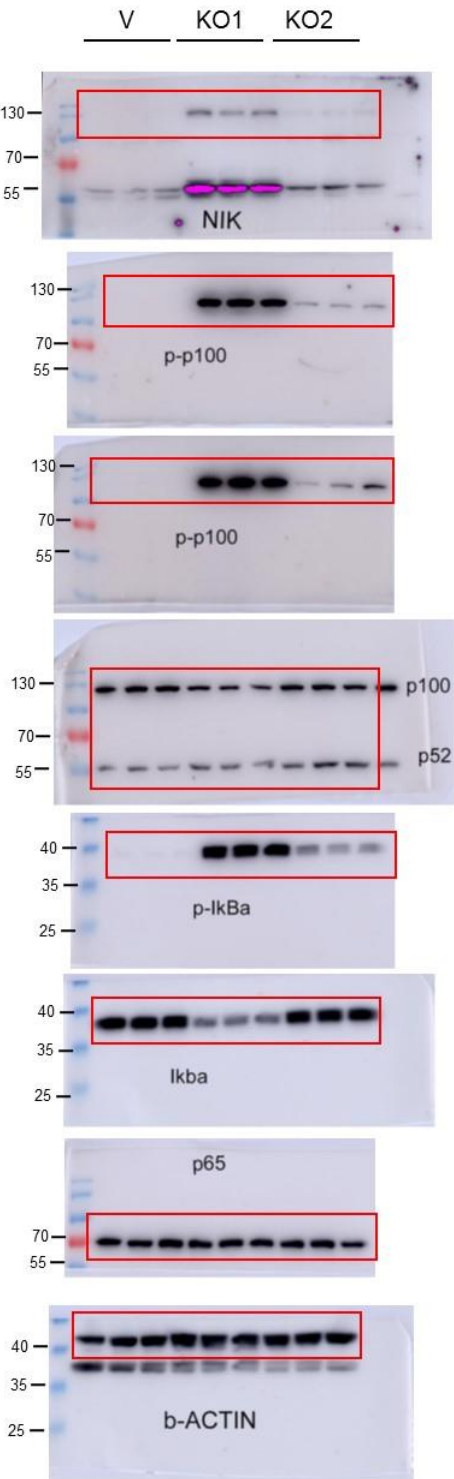

**Fig. S8b protein expression in HepG2 cells treated with indicated combination of MLN and TNFa**

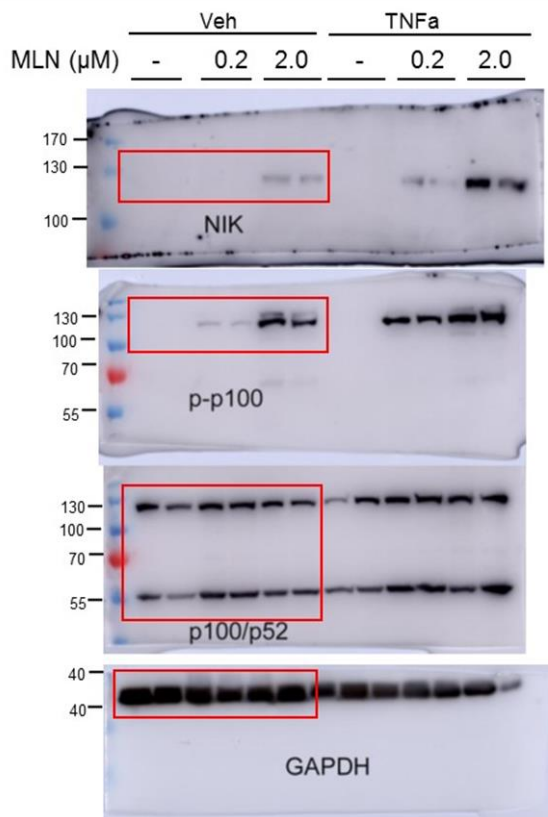

**Fig. S8d Endogenous NIK expression in response to BZM and/or MLN treatment**

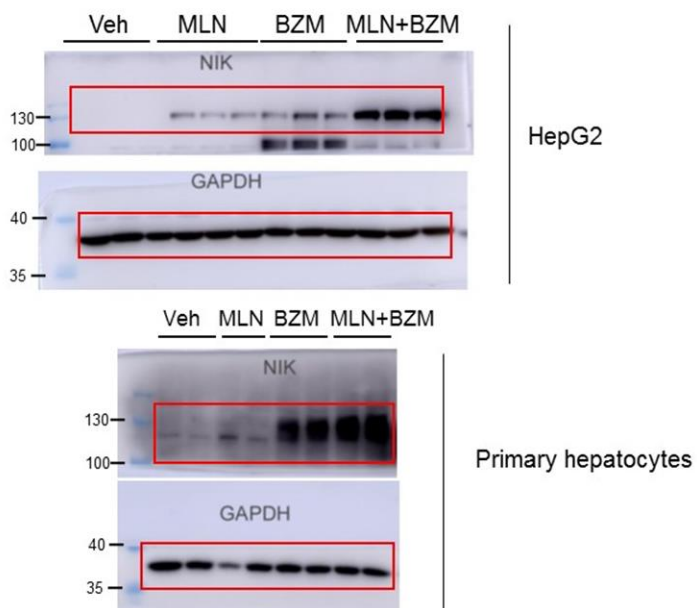

**Fig. S8e protein expression in nuclear fraction of livers from D21 and D24 mice post virus injections.**

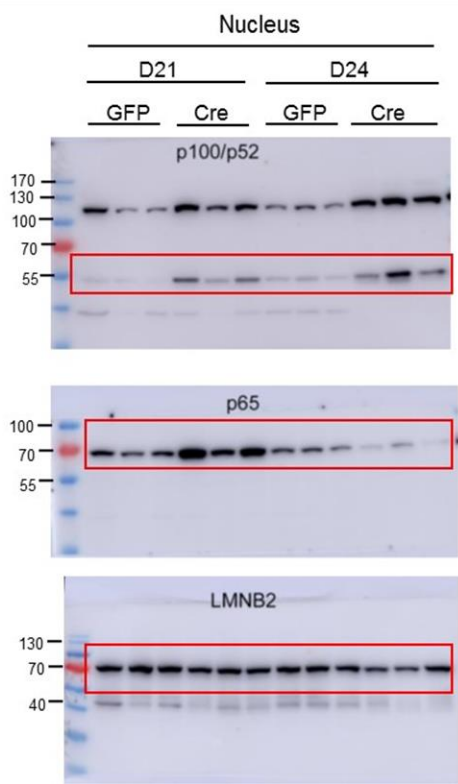

**Fig. S8f Protein expression in whole liver extracts from D21 and D24 AAV-GFP and AAV-Cre mice**

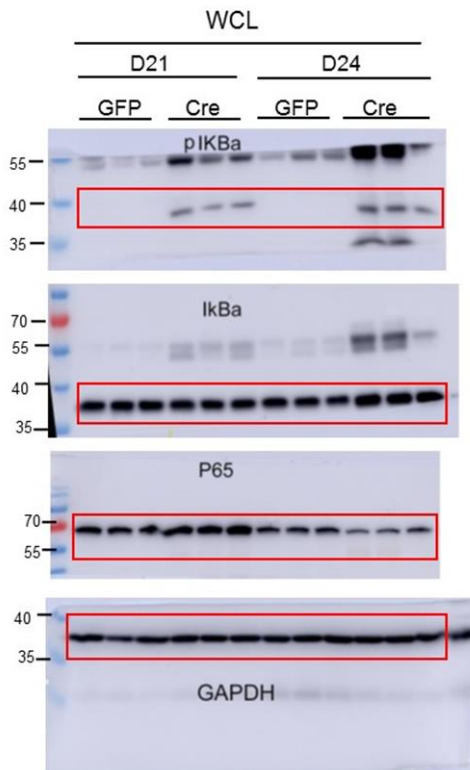

**Fig. S8g Western blotting analyses of canonical NF- $\kappa$ B signaling in primary hepatocytes 48h after pAd-GFP or pAd-Cre infection**

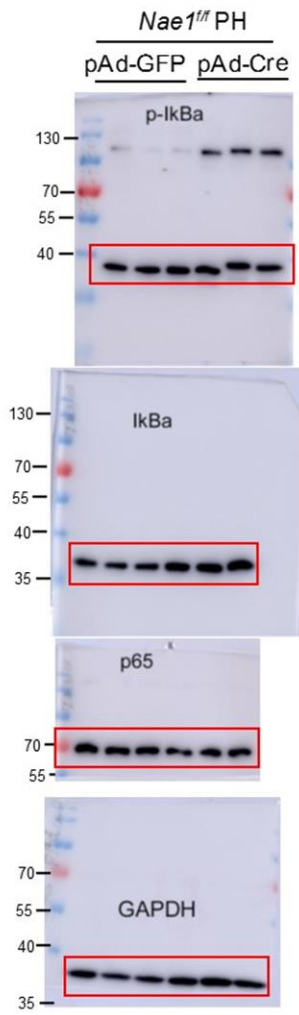

**Fig. S9a-9b NIK expression in HepG2 cells with CUL2 or CUL3 deletion by CRISPR/Cas9**

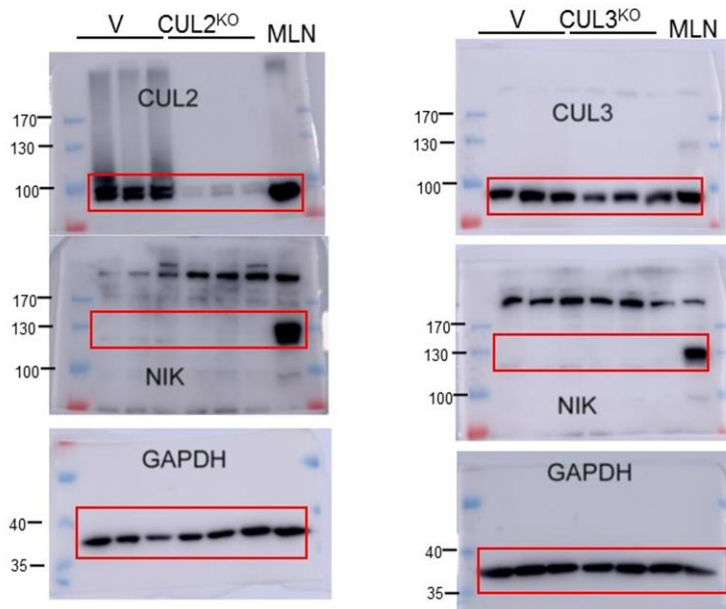

**Fig S9c-9d. NIK expression in NIH-3T3 cells after CUL1 and 4a deletion by CRISPR/Cas9**

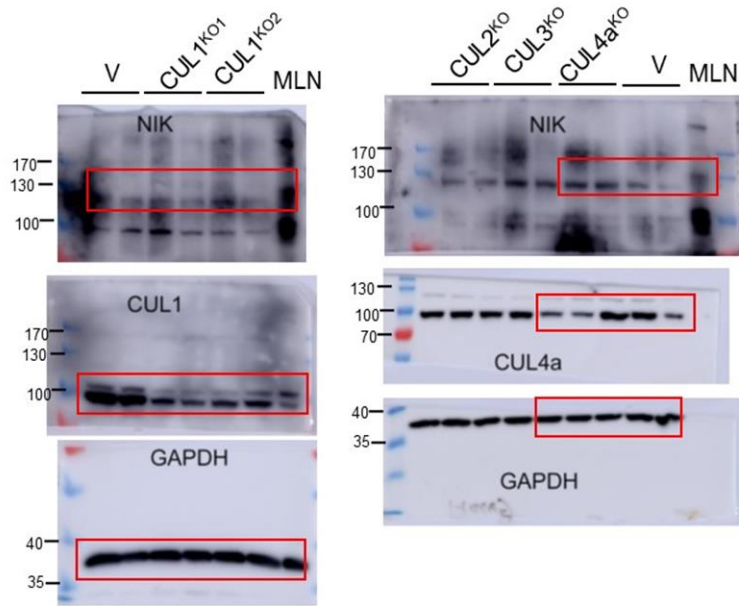

**Fig S9e. NIK expression in HepG2 cells with RBX2 deleted by CRISPR/Cas9**

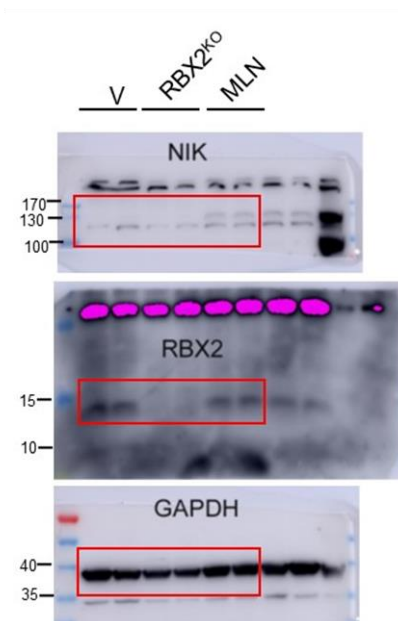

**Fig. S9f Time and dose-dependent response of MLN on NIK neddylation in HepG2 cells**

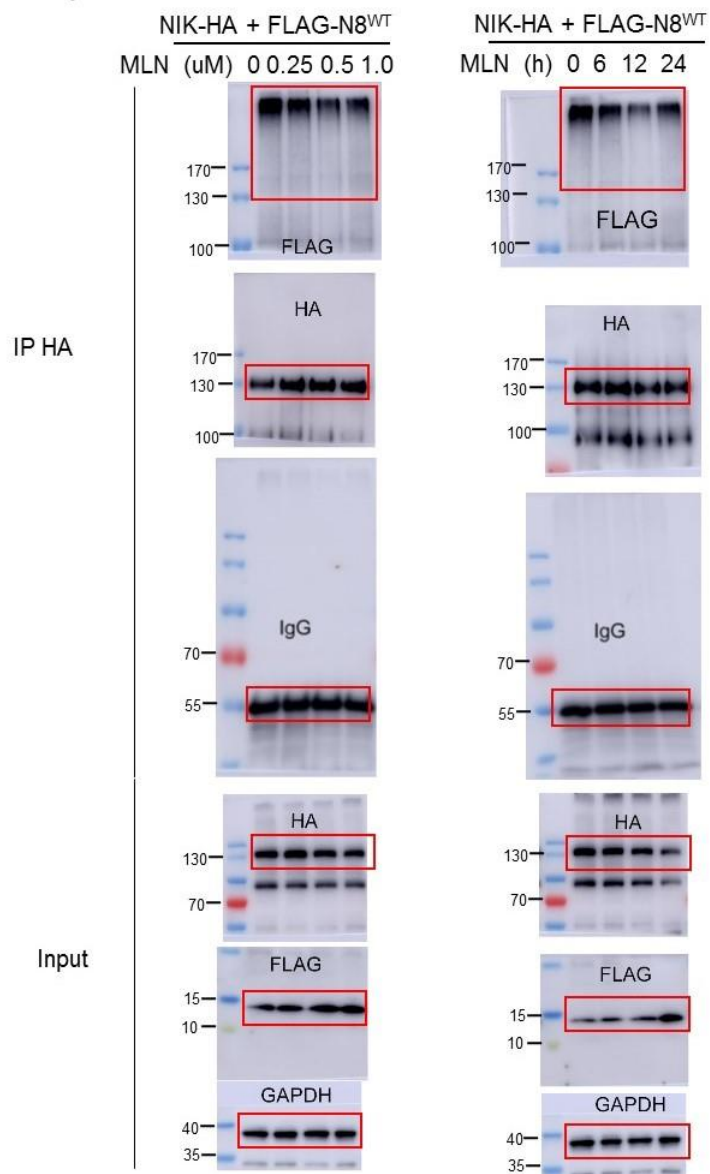



**Fig. S10a SDS-PAGE and coomassie blue staining after denaturing anti-HA IP in HEK293T cells overexpressing NIK-HA alone or with FLAG-N8<sup>WT</sup>**

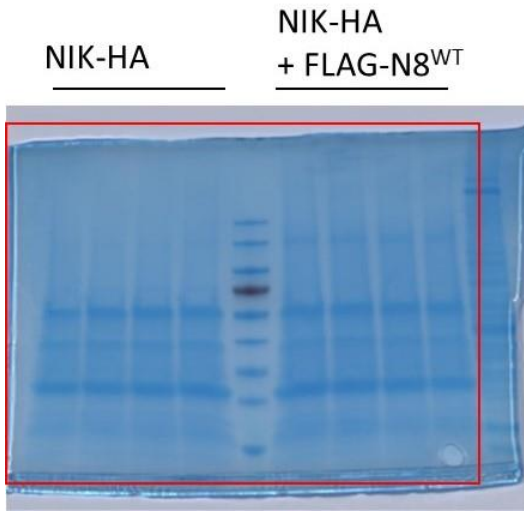

**Fig. S10c Denaturing anti-HA IP in HEK293T cells overexpressing NIK-WT or various single K to R mutants together with FLAG-N8<sup>WT</sup>**

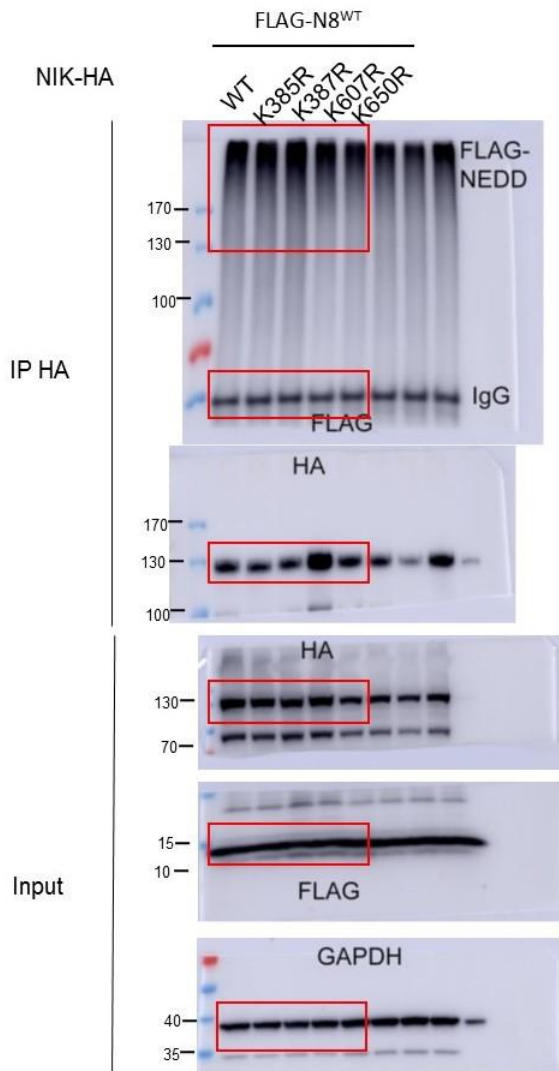



**Fig. S10d Immunoprecipitation of NIK-HA in HepG2 cells overexpressed with indicated constructs**

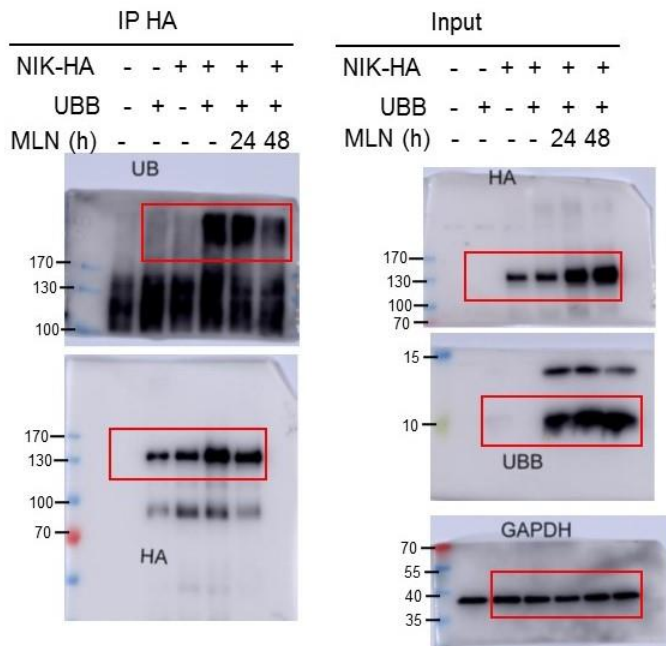

**Fig. S11a Protein expression in whole liver extracts from D21 and D24 AAV-GFP and AAV-Cre mice**

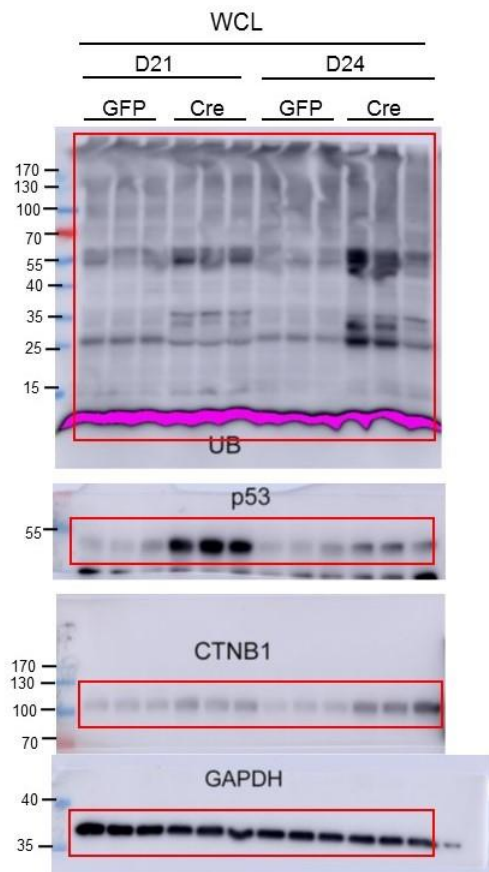

## Supplementary References

1. Bligh EG, Dyer WJ. A rapid method of total lipid extraction and purification. *Can J Biochem Physiol* **37**, 911-917 (1959).
2. Nunnari JJ, Zand T, Joris I, Majno G. Quantitation of oil red O staining of the aorta in hypercholesterolemic rats. *Exp Mol Pathol* **51**, 1-8 (1989).
3. Ali SF, Lebel CP, Bondy SC. Reactive Oxygen Species Formation as a Biomarker of Methylmercury and Trimethyltin Neurotoxicity. *Neurotoxicology* **13**, 637-648 (1992).
4. Hattori M, Tugores A, Veloz L, Karin M, Brenner DA. A simplified method for the preparation of transcriptionally active liver nuclear extracts. *DNA Cell Biol* **9**, 777-781 (1990).
5. Xiao G, Sun SC. Negative regulation of the nuclear factor kappa B-inducing kinase by a cis-acting domain. *J Biol Chem* **275**, 21081-21085 (2000).
6. Lim KL, *et al.* Parkin mediates nonclassical, proteasomal-independent ubiquitination of synphilin-1: implications for Lewy body formation. *J Neurosci* **25**, 2002-2009 (2005).
7. Gao F, Cheng J, Shi T, Yeh ET. Neddylation of a breast cancer-associated protein recruits a class III histone deacetylase that represses NFkappaB-dependent transcription. *Nat Cell Biol* **8**, 1171-1177 (2006).
8. Sanjana NE, Shalem O, Zhang F. Improved vectors and genome-wide libraries for CRISPR screening. *Nat Methods* **11**, 783-784 (2014).
